# Supplementary material
Source: PubMed Central journal article supplement (PMC4737943)
Supplement: ismej201597x1.pdf [file ismej201597x1.pdf]

Supplementary Information for the manuscript:

**Phylogeny and physiology of the candidate phylum ‘Atribacteria’ (OP9/JS1) inferred from cultivation-independent genomics**

Masaru K. Nobu<sup>1,†</sup>, Jeremy A. Dodsworth<sup>2,3,†,\*</sup>, Senthil K. Murugapiran<sup>2,†</sup>, Christian Rinke<sup>4,5</sup>, Esther A. Gies<sup>6</sup>, Gordon Webster<sup>7</sup>, Patrick Schwientek<sup>4</sup>, Peter Kille<sup>7</sup>, John Parkes<sup>8</sup>, Henrik Sass<sup>8</sup>, Bo Barker Jørgensen<sup>9</sup>, Andrew Weightman<sup>7</sup>, Wen-Tso Liu<sup>1</sup>, Steven J. Hallam<sup>6</sup>, George Tsiamis<sup>10</sup>, Tanja Woyke<sup>4</sup>, and Brian P. Hedlund<sup>2,11</sup>.

<sup>1</sup>Department of Civil and Environmental Engineering, University of Illinois at Champaign-Urbana, Illinois, 61802, USA

<sup>2</sup>School of Life Science, University of Nevada, Las Vegas, Nevada, 89154, USA

<sup>3</sup>Department of Biology, California State University, San Bernardino, California, 92407, USA

<sup>4</sup>DOE Joint Genome Institute, Walnut Creek, CA, 94598, USA

<sup>5</sup>Australian Centre for Ecogenomics, University of Queensland, St. Lucia, QLD 4072, Australia

<sup>6</sup>Department of Microbiology and Immunology and Graduate Program in Bioinformatics, University of British Columbia, Vancouver, British Columbia, V6T 1Z3 Canada

<sup>7</sup>Cardiff School of Biosciences, Cardiff University, Cardiff, Wales CF10 3AT, UK

<sup>8</sup>School of Earth and Ocean Sciences, Cardiff University, Cardiff, Wales CF10 3AT, UK

<sup>9</sup>Center for Geomicrobiology, Aarhus University, Ny Munkegade 114, Aarhus, DK-8000, Denmark

<sup>10</sup>Department of Environmental and Natural Resources Management, University of Patras, Agrinio, T.K. 30100, Greece

<sup>11</sup>Nevada Institute of Personalized Medicine, University of Nevada, Las Vegas, Nevada, 89154, USA

## Supplementary Information

- Supplementary methods
- Table S1. Datasets and accession numbers.
- Table S2. Comparison of intraphylum median and minimum 16S rRNA gene identity in the 'Atribacteria' and other bacterial and archaeal phyla.
- Table S3. Markers associated with diderm cell envelope structure in 'Atribacteria'.
- Table S4. Putative conserved, monophyletic genes in 'Atribacteria'.
- Table S5. "Atribacteria" genes involved in propionate catabolism and energy conservation.
- Figure S1 comparing binning methods in TA biofilm.
- Figure S2. 16S rRNA gene phylogeny of OP9 and JS1 with all available near-full length sequences.
- Figure S3. Phylogenomic analysis of OP9, JS1 and selected other Bacteria using 83 conserved markers.
- Figure S4. Comparison of N-terminal regions of DERA and ribose 5-phosphate isomerase in 'Atribacteria' and close homologs.
- Figures S5-S12. Phylogenies of BMC cluster genes.
- Figure S13. Propionate degradation pathway in JS1-1 and JS1-2 lineages.
- List of contigs in metagenome bins.

## Supplementary Methods

### *Sequencing and assembly of Aarhus Bay SAGs B17 and I22.*

Cell extraction and cell sorting from Aarhus Bay sediments was as described in Lloyd *et al.* (2013). Single cells were lysed and genomic DNA amplified using multiple-strand displacement amplification (MDA); after screening with bacterial 16S rRNA gene PCR, two single cells were identified as JS1 (Lloyd *et al.*, 2013) and these SAGs were re-amplified by MDA at Cardiff University. Three replicate MDA reactions were performed for each SAG, and the resulting DNA purified and pooled using Microcon centrifugal filters (Merck Millipore Ltd., Hertfordshire, UK) and eluted in 200 µl sterile TE buffer (Sigma-Aldrich, St. Louis, MO, USA). Sequencing of the SAG B17 was performed using a combination of the Roche 454 GS FLX+ System (525 bp mean read length) by CGR, University of Liverpool and Illumina MiSeq platform (Illumina Inc., San Diego, CA, USA) with 250 base paired-end reads at Edinburgh Genomics, University of Edinburgh. SAG I22 was sequenced by Illumina MiSeq platform with 250 base paired-end reads at Edinburgh Genomics, University of Edinburgh. Library preparation for Illumina MiSeq was carried out using the TruSeq DNA Sample Prep Kit following the manufacturer's recommendations and size selected to a mean insert size of approximately 300 bp PCR (SAG B17) using an E-Gel (Life Technologies, Grand Island, NY, USA) or 400 bp PCR (SAG I22) using a BluePippin instrument (Sage Science, Beverly, MA, USA). The MiSeq data were assembled for each individual SAG separately using SPAdes ver 2.5.1 (Bankevich *et al.*, 2012) with a kmer size of 87 (-k 87) and with 'single-cell', 'mismatch correction', 'rectangles graph algorithm for repeat resolution' options (--sc --careful --rectangle). The 454 data for B17 SAG was assembled using Roche GS denovo Assembler ver 2.6 with 'use read tips' and 'expected depth' options (-urt -e 500). B17 contigs from SPAdes and Newbler were further merged with minimus2 (Somer *et al.*, 2007) if contig overlap was greater than 40bp with a minimum percentage identity of 96 (options OVERLAP=40 and MINID=96) to generate the combined B17 assembly.

### References for Supplementary Methods

Bankevich A, Nurk S, Antipov D, Gurevich AA, Dvorkin M, Kulikov AS, *et al.* (2012). SPAdes: a new genome assembly algorithm and its applications to single-cell sequencing. *J Comput Biol* **19**:455-477.

Lloyd KG, Schreiber L, Petersen DG, Kjeldsen KU, Lever MA, Steen AD, *et al.* (2013). Predominant archaea in marine sediments degrade detrital proteins. *Nature* **496**:215–218.

Somer DD, Delcher AL, Salzberg SL, Pop M. (2007). Minimus: a fast, lightweight genome assembler. *BMC Bioinform* **8**:64.

Table S1. SAG and metagenome datasets used or generated in this study.

| Dataset                                | Type <sup>1</sup> | RAST ID <sup>2</sup> | JGI IMG taxon ID        | NCBI accession | Reference                              |
|----------------------------------------|-------------------|----------------------|-------------------------|----------------|----------------------------------------|
| Sakinaw Lake SAG co-assembly           | SAG               | 6666666.54176        | 2527291521              | AWNT000000000  | Rinke <i>et al.</i> (2013)             |
| Sakinaw Lake SAG 124                   | SAG               | 6666666.100175       | 2264867201              | ASLT000000000  | Rinke <i>et al.</i> (2013)             |
| Sakinaw Lake SAG 130                   | SAG               | 6666666.100178       | 2264867202              | ASPA000000000  | Rinke <i>et al.</i> (2013)             |
| Sakinaw Lake SAG 136                   | SAG               | 6666666.100183       | 2264867203              | ASPC000000000  | Rinke <i>et al.</i> (2013)             |
| Sakinaw Lake SAG 217                   | SAG               | 6666666.54177        | 2264867208              | AQRY000000000  | Rinke <i>et al.</i> (2013)             |
| Sakinaw Lake SAG 219                   | SAG               | 6666666.100187       | 2264867210              | AQSW000000000  | Rinke <i>et al.</i> (2013)             |
| TA biofilm SAG 167                     | SAG               | 6666666.54173        | 2264867204              | ASLS000000000  | Rinke <i>et al.</i> (2013)             |
| TA biofilm SAG 231                     | SAG               | 6666666.54174        | 2264867212              | ASOY000000000  | Rinke <i>et al.</i> (2013)             |
| TA biofilm SAG 232                     | SAG               | 6666666.54182        | 2264867213              | AQRR000000000  | Rinke <i>et al.</i> (2013)             |
| Etoliko Lagoon SAG 227                 | SAG               | 6666666.54175        | 2264867211              | ASOZ000000000  | Rinke <i>et al.</i> (2013)             |
| Aarhus Bay SAG B17                     | SAG               | 6666666.54178        | None                    | CDPL010000000  | Lloyd <i>et al.</i> (2013); this study |
| Aarhus Bay SAG I22                     | SAG               | 6666666.94538        | None                    | CDPM010000000  | Lloyd <i>et al.</i> (2013); this study |
| LHC SAG co-assembly                    | SAG               | 6666666.23228        | 2527291510              | APKF000000000  | Dodsworth <i>et al.</i> (2013)         |
| GBS 77CS MG bin                        | MG bin            | 6666666.23137        | 3300000106              | APCU000000000  | Dodsworth <i>et al.</i> (2013)         |
| GBS 77CS MG bin, coverage-filtered bin | MG bin            | 6666666.94617        | 3300000106 <sup>3</sup> | None           | This study                             |
| TA biofilm JS1 MG bin                  | MG bin            | 6666666.54181        | 3300001095 <sup>3</sup> | None           | This study                             |
| Sakinaw Lake JS1 MG bin                | MG bin            | 6666666.54179        | 2263328000 <sup>3</sup> | None           | This study                             |
| GBS 77CS cellulolytic enrichment 77CS  | MG                | None                 | 3300000106              | None           | Peacock <i>et al.</i> (2013)           |
| Terephthalate-degrading biofilm        | MG                | None                 | 3300001095              | None           | Nobu <i>et al.</i> (2014)              |
| Sakinaw Lake metagenomic (120m)        | MG                | None                 | 2263328000              | None           | Unpublished                            |
| Sediment from Etoliko Lagoon, Greece   | MG                | None                 | 2149837013              | None           | Unpublished                            |

<sup>1</sup>Abbreviations: MG, metagenome

<sup>2</sup>All SAG and metagenome bin datasets are publicly available on the guest account on RAST (<http://rast.nmpdr.org/>) by logging in with username and password = “guest”.

<sup>3</sup>These bins represent a subset of contigs in the corresponding metagenomes, whose accession numbers are given. Individual contig names for each of these bins are appear at the end of the supplementary information, and are also publically available via RAST (username and password “guest”) as indicated above.

Table S2. Comparison of minimum and median % identity within members of various bacterial phyla.<sup>1</sup>

| Taxon name                          | Number of members | Number of comparisons | Minimum % identity | Median % identity |
|-------------------------------------|-------------------|-----------------------|--------------------|-------------------|
| Phylum <i>Thermodesulfobacteria</i> | 7                 | 21                    | 88.1               | 93.7              |
| Phylum <i>Chlorobi</i>              | 11                | 55                    | 87.5               | 93.6              |
| Phylum <i>Cyanobacteria</i>         | 7                 | 21                    | 86.7               | 88.4              |
| Phylum <i>Chlamydiae</i>            | 13                | 78                    | 83.7               | 87.65             |
| Phylum <i>Actinobacteria</i>        | 2086              | 2135467               | 81.2               | 89.4              |
| Phylum <i>Fusobacteria</i>          | 35                | 595                   | 80.7               | 90                |
| Phylum <i>Synergistetes</i>         | 15                | 105                   | 79.9               | 83.8              |
| Phylum <i>Crenarchaeota</i>         | 45                | 990                   | 79.7               | 86.5              |
| Phylum <i>Acidobacteria</i>         | 8                 | 28                    | 78.8               | 82.45             |
| Phylum <i>Nitrospira</i>            | 8                 | 28                    | 78.7               | 80.55             |
| Phylum <i>Deferribacteres</i>       | 11                | 55                    | 78                 | 85.1              |
| Phylum <i>Thermi</i>                | 59                | 1711                  | 77.8               | 85.9              |
| Phylum <i>Thermotogae</i>           | 29                | 406                   | 76.9               | 82.3              |
| Phylum <i>Verrucomicrobia</i>       | 32                | 496                   | 76                 | 82.8              |
| Phylum <i>Aquificae</i>             | 26                | 325                   | 75.7               | 82.1              |
| Phylum <i>Chloroflexi</i>           | 15                | 105                   | 74.2               | 77.8              |
| Candidate Phylum 'Atribacteria'     | 744 <sup>2</sup>  | 70784 <sup>2</sup>    | 74.2               | 80.8              |
| Phylum <i>Planctomycetes</i>        | 12                | 66                    | 73.7               | 79.5              |
| Phylum <i>Firmicutes</i>            | 1592              | 1266268               | 73.1               | 83                |
| Phylum <i>Spirochaetes</i>          | 67                | 2211                  | 72.3               | 78.1              |
| Phylum <i>Proteobacteria</i>        | 2890              | 4174605               | 72.2               | 81.3              |
| Phylum <i>Tenericutes</i>           | 176               | 15400                 | 71.2               | 80.3              |
| Phylum <i>Bacteroidetes</i>         | 633               | 200023                | 68.5               | 79.8              |
| Phylum <i>Euryarchaeota</i>         | 241               | 28920                 | 68.3               | 77.3              |

<sup>1</sup>Data from Yarza *et al.* 2014 Table S1 except for values for Candidate Phylum 'Atribacteria' (highlighted in yellow).

<sup>2</sup>Restricted to pairwise comparisons between OP9 (112 sequences) and JS1 (632 sequences); median % identity when including comparisons within OP9 and JS1 is higher, due to oversampling of a few taxa.

Table S3. Markers<sup>1</sup> associated with a diderm cell envelope structure in 'Atribacteria' genomes.

| Example protein<br>PFAM domain   | BamA (YaeT) |         | ToIC    | Secretin | Secretin-<br>N | Secretin/<br>TonB | FlgH    | FlgI     |
|----------------------------------|-------------|---------|---------|----------|----------------|-------------------|---------|----------|
|                                  | PF07244     | PF01103 | PF02321 | PF00263  | PF03958        | PF07660           | PF02107 | PF02119  |
| <b>SAG or MG bin<sup>2</sup></b> |             |         |         |          |                |                   |         |          |
| TAbio SAG 232                    |             |         |         |          |                |                   |         |          |
| LHC SAG coassembly               | 2.7E-38     |         | 6.0E-36 | 4.6E-43  | 1.4E-09        | 4.1E-09           | 4.1E-32 |          |
| GBS 77CS MG bin                  | 2.4E-38     | 5.2E-51 | 5.3E-37 | 1.1E-42  | 1.0E-08        | 2.2E-09           | 2.3E-30 | 2.6E-140 |
| TAbio SAG 167                    |             |         | 3.4E-21 | 7.8E-37  | 9.4E-20        | 1.3E-07           |         |          |
| TAbio SAG 231                    | 5.5E-38     |         |         |          |                |                   |         |          |
| TAbio MG bin                     | 8.2E-39     | 7.4E-48 | 2.3E-21 | 4.9E-36  | 5.5E-20        |                   |         |          |
| SL SAG coassembly                | 1.5E-38     | 4.3E-53 |         |          |                |                   |         |          |
| SL SAG 124                       |             |         |         |          |                |                   |         |          |
| SL SAG 130                       | 2.0E-37     | 2.0E-42 |         | 2.0E-40  | 1.2E-16        | 4.6E-07           |         |          |
| SL SAG 136                       |             |         | 2.1E-53 |          |                |                   |         |          |
| SL SAG 217                       |             | 1.5E-17 |         | 8.8E-39  | 1.3E-16        | 9.4E-07           |         |          |
| SL SAG 219                       |             |         |         | 7.7E-24  |                |                   |         |          |
| SL MG bin                        |             |         | 6.7E-54 |          |                |                   |         |          |
| Aarhus SAG I22                   |             |         | 1.3E-18 | 4.7E-41  | 8.0E-16        | 2.0E-07           |         |          |
| Etoliko SAG 227                  |             |         | 1.9E-18 |          |                |                   |         |          |
| Aarhus SAG B17                   |             |         |         |          |                |                   |         |          |

<sup>1</sup>E-values of the top hit pfams (PF) associated with the presence of an outer membrane

(Sutcliffe 2010) are shown.

<sup>2</sup>Abbreviations: MG, metagenome; SL, Sakinaw Lake.

Table S4. Putative conserved, monophyletic genes in 'Atribacteria', with estimated genome coverage for each dataset shown in parentheses.

| Category/classification | Predicted function                                       | GBS 77CS meta (>99%) | OP9-1 | LHC SAGco (>99%) | OP9-1 | OP9-2 | JS1-1 | JS1-1 | JS1-1 | JS1-1 | Other SAK SAGs (6-73%) | JS1-1 | JS1-1 | JS1-2 | JS1-2 | JS1-3 | JS1-3 | JS1-4 |
|-------------------------|----------------------------------------------------------|----------------------|-------|------------------|-------|-------|-------|-------|-------|-------|------------------------|-------|-------|-------|-------|-------|-------|-------|
| BMC cluster             | BMC shell protein                                        | X                    | X     | X                | X     | X     |       |       |       |       |                        | X     | X     | X     |       |       |       | X     |
| BMC cluster             | BMC shell protein                                        | X                    | X     | X                | X     | X     |       |       |       |       |                        |       | X     | X     | X     |       |       | X     |
| BMC cluster             | BMC shell protein                                        | X                    | X     | X                | X     | X     |       |       |       |       |                        |       | X     | X     | X     |       |       | X     |
| BMC cluster             | Predicted NADH:ubiquinone oxidoreductase (BMC)           | X                    | X     | X                | X     | X     |       |       |       |       |                        | X     | X     | X     |       |       |       | X     |
| BMC cluster             | BMC shell protein                                        | X                    | X     | X                | X     | X     |       |       |       |       |                        | X     | X     | X     |       |       |       | X     |
| BMC cluster             | NAD-dependent aldehyde dehydrogenases (BMC)              | X                    | X     | X                | X     | X     | X     |       |       |       |                        | X     | X     | X     |       |       |       | X     |
| BMC cluster             | BMC shell protein                                        | X                    | X     | X                | X     | X     |       |       |       |       |                        |       |       | X     | X     |       |       | X     |
| BMC cluster             | BMC shell protein                                        | X                    | X     | X                | X     | X     |       |       |       |       |                        | X     |       | X     | X     |       |       | X     |
| BMC cluster             | Ribose 5-phosphate isomerase RpiB (BMC)                  | X                    | X     | X                | X     | X     |       |       |       |       |                        | X     |       | X     |       |       |       | X     |
| BMC cluster             | Deoxyribose-phosphate aldolase (BMC)                     | X                    | X     | X                | X     | X     |       |       |       |       |                        | X     |       | X     |       |       |       | X     |
| BMC cluster             | Propanediol utilization protein (BMC)                    | X                    | X     | X                | X     | X     |       |       |       |       |                        | X     |       | X     |       |       |       | X     |
| Regulation              | Transcriptional regulator                                | X                    | X     |                  | X     |       |       |       |       |       | X                      |       | X     | X     | X     | X     |       | X     |
| Protease                | Clostripain family                                       |                      |       |                  | X     |       |       |       |       |       | X                      |       | X     | X     |       |       |       |       |
| C metabolism            | Glucuronate isomerase                                    | X                    | X     |                  | X     |       |       |       |       |       | X                      |       | X     | X     |       |       |       |       |
| C metabolism            | Uroporphyrinogen-III decarboxylase                       | X                    | X     |                  |       |       |       |       |       |       | X                      |       |       |       |       |       |       | X     |
| C metabolism            | Predicted thioesterase - COG5496                         | X                    |       |                  | X     | X     |       |       |       |       |                        |       | X     | X     |       |       |       |       |
| Redox balancing         | Thioredoxin domain-containing protein                    |                      |       |                  | X     |       |       |       |       |       |                        |       | X     | X     |       |       | X     |       |
| Redox balancing         | Electron bifurcating formate dehydrogenase, HyIB subunit | X                    |       |                  |       |       |       |       |       |       | X                      |       | X     |       |       |       |       |       |
| Cell envelope           | Membrane carboxypeptidase (penicillin-binding protein)   | X                    | X     |                  | X     |       |       |       |       |       | X                      | X     | X     | X     |       |       |       | X     |
| Cell envelope           | Membrane proteins related to metalloendopeptidases       | X                    | X     |                  |       |       |       |       |       |       | X                      | X     | X     | X     |       |       |       |       |
| Cell envelope           | Outer membrane protein/protective antigen OMA87          | X                    | X     |                  |       |       |       |       |       |       | X                      |       | X     | X     |       |       |       |       |
| Cell envelope           | S-layer homology domain                                  | X                    | X     | X                | X     |       |       |       |       |       | X                      |       | X     | X     |       |       |       |       |
| Cell envelope           | Organic solvent tolerance protein                        |                      |       |                  | X     |       |       |       |       |       | X                      |       | X     | X     |       |       |       |       |
| Cell envelope           | integral membrane protein MviN                           | X                    | X     | X                |       |       |       |       | X     |       | X                      | X     | X     | X     |       |       |       |       |
| Cell envelope/division  | ATP-dependent metalloprotease FtsH                       | X                    |       |                  | X     | X     |       |       |       |       | X                      |       | X     | X     | X     |       |       | X     |
| Transport/secretion     | Predicted exporters, RND superfamily                     | X                    | X     |                  | X     | X     |       |       |       |       |                        |       |       |       | X     | X     | X     |       |
| Transport/secretion     | Preprotein translocase subunit SecY                      | X                    | X     |                  | X     | X     |       |       |       |       | X                      |       |       |       | X     |       |       | X     |
| Transport/secretion     | protein-export membrane protein, SecD/SecE family        | X                    | X     |                  | X     | X     |       |       |       |       | X                      |       | X     | X     |       |       |       |       |
| Transport/secretion     | ABC-type transport system, periplasmic component         | X                    | X     |                  | X     |       |       |       |       |       | X                      | X     | X     | X     |       |       |       | X     |
| Transport/secretion     | Predicted ABC-type sugar transport system                | X                    | X     |                  |       |       |       |       |       |       | X                      |       |       | X     |       |       |       |       |
| Transport/secretion     | Type II secretory pathway, component PulD                | X                    | X     |                  |       |       |       | X     |       |       | X                      | X     |       | X     |       |       |       | X     |
| Transport/secretion     | Biopolymer transport protein                             | X                    | X     | X                |       |       |       |       |       |       | X                      |       |       | X     |       |       |       |       |
| Transport/secretion     | ABC-type transport system, permease component            | X                    | X     |                  |       |       |       |       |       |       | X                      |       | X     | X     |       |       |       |       |
| Transport/secretion     | Biopolymer transport proteins                            | X                    | X     | X                |       |       |       |       |       |       | X                      |       |       | X     |       |       |       |       |
| Transport/secretion     | ABC-type sugar transport system, periplasmic component   |                      | X     |                  |       |       |       |       |       |       | X                      |       |       | X     |       |       |       |       |
| Housekeeping            | DNA-directed RNA polymerase, beta' subunit               | X                    | X     |                  | X     |       |       |       |       |       | X                      |       |       | X     |       |       |       | X     |
| Housekeeping            | DNA-directed RNA polymerase, beta subunit                | X                    | X     |                  | X     | X     |       |       |       |       | X                      |       |       | X     |       |       |       |       |
| Housekeeping            | ATPases involved in chromosome partitioning              | X                    | X     |                  | X     |       |       |       |       |       | X                      |       | X     | X     |       |       |       | X     |
| Housekeeping            | Single stranded DNA-binding protein (ssb)                | X                    | X     | X                | X     |       |       |       |       |       | X                      |       |       |       |       |       |       | X     |
| Housekeeping            | uracil-DNA glycosylase, family 4                         | X                    | X     | X                |       |       |       |       |       |       | X                      |       | X     | X     |       |       |       | X     |
| Housekeeping            | Thymidylate kinase                                       | X                    | X     | X                | X     |       |       |       |       |       | X                      | X     |       | X     |       |       |       |       |
| Housekeeping            | Argininosuccinate synthase                               | X                    | X     | X                |       |       |       |       |       |       | X                      |       |       | X     |       |       |       |       |
| Other/unknown           | hypothetical protein                                     | X                    | X     |                  | X     |       |       |       |       |       | X                      |       | X     |       |       | X     | X     |       |
| Other/unknown           | Protein of unknown function (DUF1329)                    | X                    | X     |                  | X     |       |       |       |       |       |                        |       | X     | X     | X     | X     |       |       |
| Other/unknown           | hypothetical protein                                     | X                    | X     |                  |       |       |       |       |       |       | X                      |       | X     | X     |       |       |       |       |
| Other/unknown           | Domain of unknown function (DUF1844)                     | X                    | X     |                  | X     | X     | X     |       |       |       | X                      |       | X     |       |       |       |       |       |
| Other/unknown           | Uncharacterized protein (ATP-grasp superfamily)          | X                    | X     | X                |       |       |       |       |       |       |                        |       |       | X     |       |       |       | X     |
| Other/unknown           | Transposase and inactivated derivatives                  |                      |       |                  | X     |       |       |       |       |       | X                      |       |       |       |       | X     |       |       |
| Other/unknown           | Protein of unknown function (DUF3048)                    | X                    |       |                  |       |       |       |       |       |       | X                      |       |       | X     |       |       |       |       |
| Other/unknown           | hypothetical protein                                     |                      | X     |                  |       |       |       |       |       |       | X                      |       |       |       |       |       |       | X     |
| Other/unknown           | Uncharacterized protein conserved in bacteria            |                      | X     |                  |       |       |       |       |       |       | X                      |       |       |       |       |       |       | X     |



Table S5. COGs, Pfams, and RAST protein-encoding gene (peg) numbers for genes predicted to be involved in propionate catabolism and energy conservation in JS1-1 and JS1-2 datasets.

|                                                     | COG     | Pfam    | TA biofilm<br>SAG 231 | TA biofilm<br>MG bin | Sakinaw Lake<br>co-assembly | Sakinaw Lake<br>MG bin | Sakinaw Lake<br>SAG 124 | Sakinaw Lake<br>SAG 130 | Sakinaw Lake<br>SAG 136 | Sakinaw Lake<br>SAG 219 | Aarhus Bay<br>SAG 122 |
|-----------------------------------------------------|---------|---------|-----------------------|----------------------|-----------------------------|------------------------|-------------------------|-------------------------|-------------------------|-------------------------|-----------------------|
| <b>Propionate catabolism</b>                        |         |         |                       |                      |                             |                        |                         |                         |                         |                         |                       |
| Methylmalonyl-CoA decarboxylase, alpha subunit      | COG4799 | PF01039 | 601                   | 1651                 | 2116                        | 83                     | np                      | 192                     | 1021                    | np                      | np                    |
| Methylmalonyl-CoA decarboxylase, gamma subunit      | COG4770 | PF00364 | 603                   | np                   | 2114                        | np                     | np                      | 190                     | 1019                    | np                      | np                    |
| methylmalonyl-CoA epimerase                         | None    | PF13669 | 600                   | np                   | 2117                        | 84                     | np                      | 193                     | 1022                    | np                      | np                    |
| Biotin-(acetyl-CoA carboxylase) ligase              | COG0340 | PF03099 | 476                   | np                   | np                          | np                     | 18                      | 2                       | np                      | 401                     | np                    |
| Methylmalonyl-CoA mutase, N-terminal domain         | COG1884 | PF01642 | 597                   | 706                  | 1709                        | np                     | np                      | 196                     | np                      | np                      | np                    |
| Methylmalonyl-CoA mutase, C-terminal domain         | COG2185 | PF02310 | 598                   | 707                  | 1708                        | np                     | np                      | 195                     | np                      | np                      | np                    |
| Succinyl-CoA synthetase, alpha subunit              | COG0074 | PF00549 | 510                   | np                   | 858                         | np                     | np                      | 381                     | 447                     | np                      | 1050                  |
| Succinyl-CoA synthetase, beta subunit               | COG0045 | PF00549 | 511                   | np                   | 857                         | np                     | np                      | 382                     | 448-9                   | np                      | 1049                  |
| Fumarate hydratase                                  | COG1027 | PF10415 | np                    | 651                  | np                          | np                     | np                      | np                      | np                      | 656                     | np                    |
| Fumarate hydratase class I, C-terminal domain       | COG1838 | PF05683 | np                    | 1373                 | 1764                        | np                     | np                      | 1175                    | 440                     | 149                     | np                    |
| Fumarate hydratase class I, N-terminal domain       | COG1951 | PF05681 | np                    | np                   | 1763                        | np                     | np                      | 1176                    | 441                     | 150                     | np                    |
| Pyruvate:ferredoxin oxidoreductase                  | COG0674 | PF01558 | 394                   | np                   | np                          | np                     | np                      | 1690                    | 62                      | 639                     | np                    |
| 2-oxoacid:ferredoxin oxidoreductases, gamma subunit | COG1014 | PF01558 | 953                   | 1059                 | 8                           | np                     | np                      | 1325                    | 450                     | 103                     | 403                   |
| 2-oxoacid:ferredoxin oxidoreductases, beta subunit  | COG1013 | PF02775 | 954                   | 1058                 | 9                           | 290                    | np                      | 1326                    | 451                     | 104                     | 404                   |
| 2-oxoacid:ferredoxin oxidoreductases, alpha subunit | COG0674 | PF01855 | 955                   | 1057                 | 10                          | np                     | np                      | 1327                    | 452                     | 105                     | 405                   |
| Succinate dehydrogenase/fumarate reductase          | COG0029 | PF02910 | np                    | 1020                 | 388                         | np                     | np                      | 1124                    | np                      | 338                     | np                    |
| Malate dehydrogenase                                | COG2055 | PF02615 | np                    | 602                  | 1505                        | np                     | np                      | np                      | 40                      | np                      | np                    |
| Pyruvate-formate lyase                              | COG1882 | PF01228 | 188                   | 84                   | 927                         | 93                     | np                      | np                      | 802                     | 831                     | 323                   |
| Pyruvate-formate lyase-activating enzyme            | COG1180 | None    | 189                   | 85                   | 928                         | np                     | np                      | np                      | 801                     | 832                     | 324                   |
| <b>Electron transfer flavoprotein</b>               |         |         |                       |                      |                             |                        |                         |                         |                         |                         |                       |
| Electron transfer flavoprotein, alpha subunit       | COG2086 | PF01012 | 581                   | 481                  | np                          | np                     | np                      | 241                     | 1156                    | 396                     | 719                   |
| Electron transfer flavoprotein, beta subunit        | COG2025 | PF00766 | 582                   | 482                  | np                          | np                     | np                      | 242                     | 1157                    | 397                     | 718                   |
| <b>Membrane-bound hydrogenase</b>                   |         |         |                       |                      |                             |                        |                         |                         |                         |                         |                       |
| Hydrogenase nickel insertion protein HypA           | COG0375 | PF01155 | 831                   | 528                  | 228                         | np                     | np                      | 1581                    | np                      | 463                     | 294                   |
| Membrane-bound hydrogenase MbhA subunit             | COG1863 | PF01899 | 830                   | 529                  | 229                         | np                     | np                      | np                      | np                      | 462                     | 3                     |
| Membrane-bound hydrogenase MbhB subunit             | COG2212 | PF04066 | 829                   | 530                  | 230                         | np                     | np                      | 1584                    | np                      | 461                     | 4                     |
| Membrane-bound hydrogenase MbhC subunit             | COG1320 | PF03334 | 828                   | 531                  | 231                         | np                     | np                      | 1585                    | 1353                    | 460                     | np                    |

|                                         |         |         |      |      |     |    |    |      |      |     |      |
|-----------------------------------------|---------|---------|------|------|-----|----|----|------|------|-----|------|
| Membrane-bound hydrogenase MbhD subunit | None    | None    | 827  | 532  | 232 | np | np | 1586 | 1354 | 459 | np   |
| Membrane-bound hydrogenase MbhE subunit | COG2111 | None    | 826  | 533  | 233 | np | np | 1587 | 1355 | 458 | 1057 |
| Membrane-bound hydrogenase MbhF subunit | COG2111 | PF04039 | 825  | 534  | 234 | np | np | 1588 | 1356 | 457 | 1058 |
| Membrane-bound hydrogenase MbhG subunit | COG1006 | PF00420 | 824  | 535  | 235 | np | np | 1589 | 1357 | 456 | 610  |
| Membrane-bound hydrogenase MbhH subunit | COG0651 | PF00361 | 994  | np   | 236 | np | np | 842  | 1358 | 455 | 611  |
| Membrane-bound hydrogenase MbhI subunit | None    | None    | 995  | np   | 237 | np | np | 841  | 1360 | 454 | 612  |
| Membrane-bound hydrogenase MbhJ subunit | COG3260 | PF01058 | 996  | 1897 | 238 | np | np | 840  | 1361 | 453 | 613  |
| Membrane-bound hydrogenase MbhK subunit | COG3262 | PF00329 | 997  | 1896 | 239 | np | np | 839  | np   | 452 | 614  |
| Membrane-bound hydrogenase MbhL subunit | COG0649 | PF00346 | 998  | np   | 240 | np | np | 836  | np   | 451 | 615  |
| Membrane-bound hydrogenase MbhM subunit | COG0650 | PF00146 | 999  | np   | 241 | np | np | 837  | np   | 444 | 616  |
| Membrane-bound hydrogenase MbhN subunit | COG1143 | PF12838 | 1000 | np   | 242 | np | np | 838  | np   | 445 | 617  |

**Electron-bifurcating formate dehydrogenase and associated genes**

|                                           |         |         |                  |              |      |    |    |      |      |     |     |
|-------------------------------------------|---------|---------|------------------|--------------|------|----|----|------|------|-----|-----|
| Hydrogenase-like subunit HylC             | COG1905 | PF01257 | 1022,<br>1020    | 655,<br>1876 | np   | np | np | UC   | 1107 | np  | np  |
| Hydrogenase-like subunit HylB             | COG1894 | PF01512 | 1021,<br>1019-18 | 1734         | np   | np | np | 1485 | 1106 | 449 | np  |
| HylA-Formate dehydrogenase fusion protein | COG3383 | PF00384 | 1017             | 1956         | np   | 51 | np | 1484 | 1114 | 450 | np  |
| Formate efflux transporter                | COG2116 | PF01226 | 1016             | np           | np   | 52 | np | 1483 | 1113 | np  | np  |
| Molybdopterin biosynthesis MobA           | COG0746 | PF12804 | 1015             | 279          | 1846 | 53 | np | 1482 | 1112 | np  | np  |
| Formate dehydrogenase subunit D           | COG1526 | PF02634 | 1014             | 280          | 1845 | 54 | np | 1481 | 1111 | np  | np  |
| Hydrogenase maturation factor HypB        | COG0378 | PF02492 | 1012             | 282          | 1843 | 55 | np | 1479 | 1109 | np  | 618 |

Abbreviations: UC, uncalled orf in RAST annotation. np, not present

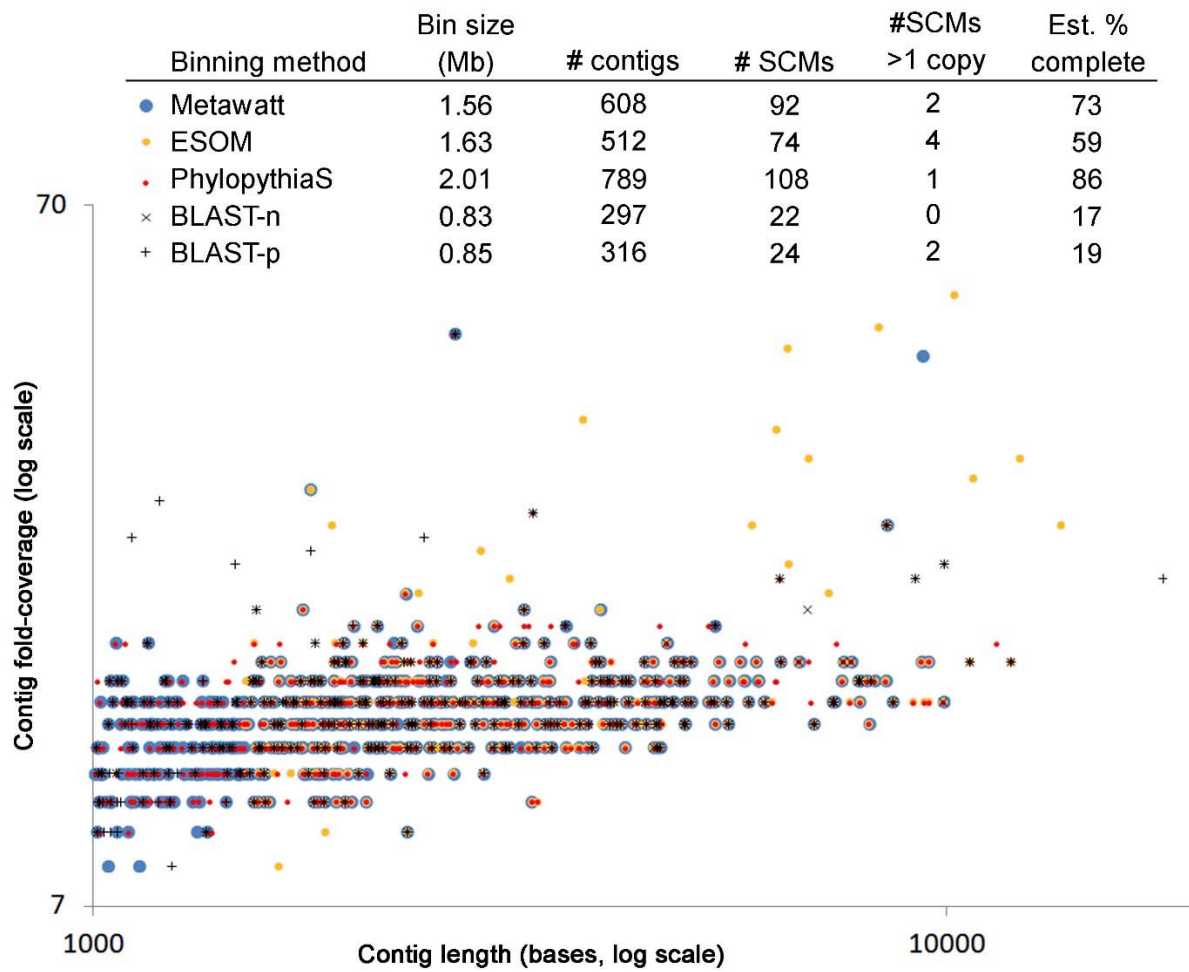

Figure S1. Comparison of several techniques for defining a JS1 bin in the TA biofilm metagenome.

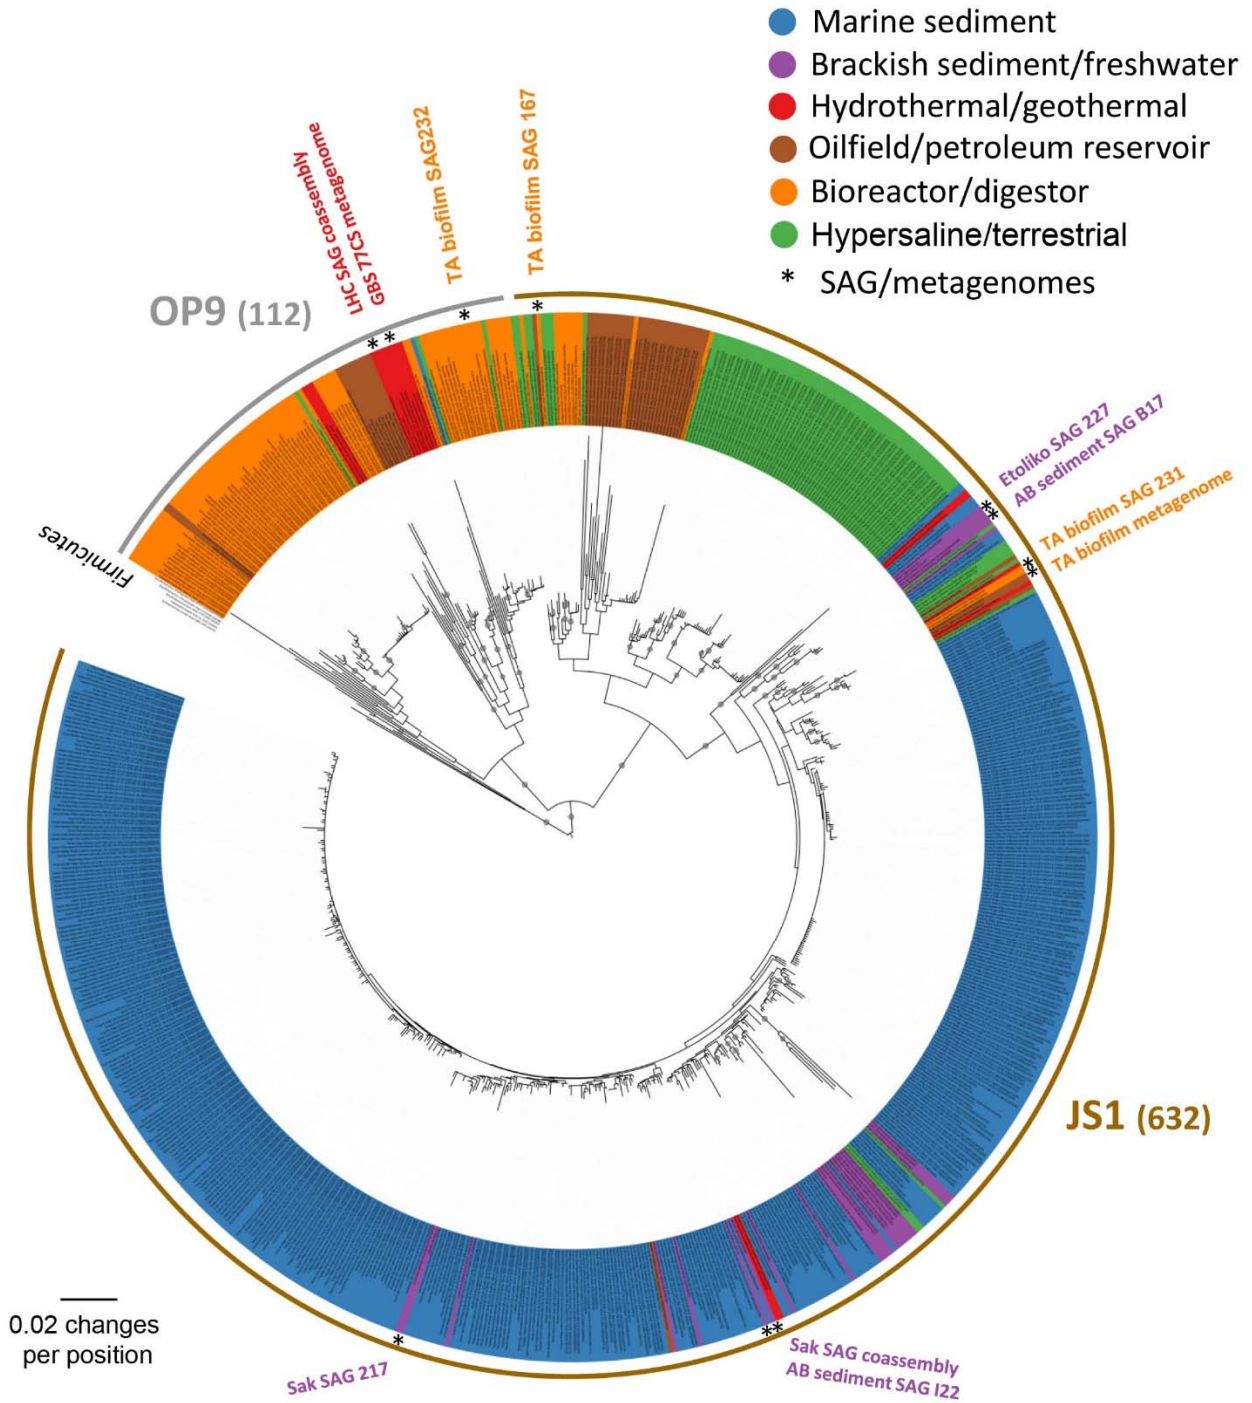

Figure S2. 16S rRNA gene phylogeny of OP9 and JS1. The number of sequences included for each lineage is indicated in parentheses.

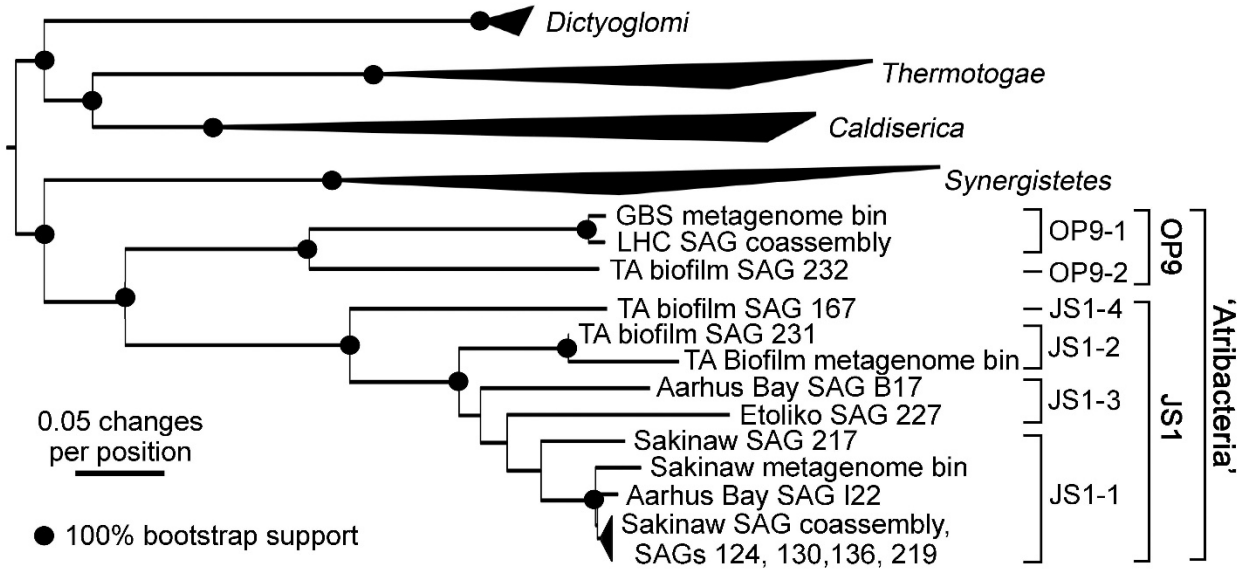

Figure S3. Phylogenomic analysis of OP9/JS1 SAGs, metagenome bin datasets, and selected bacterial phyla branching near OP9/JS1 in analyses of larger datasets. Maximum likelihood phylogeny was calculated using Fasttree based on a set of 83 SCM in Bacteria with 100 bootstrap pseudoreplicates.



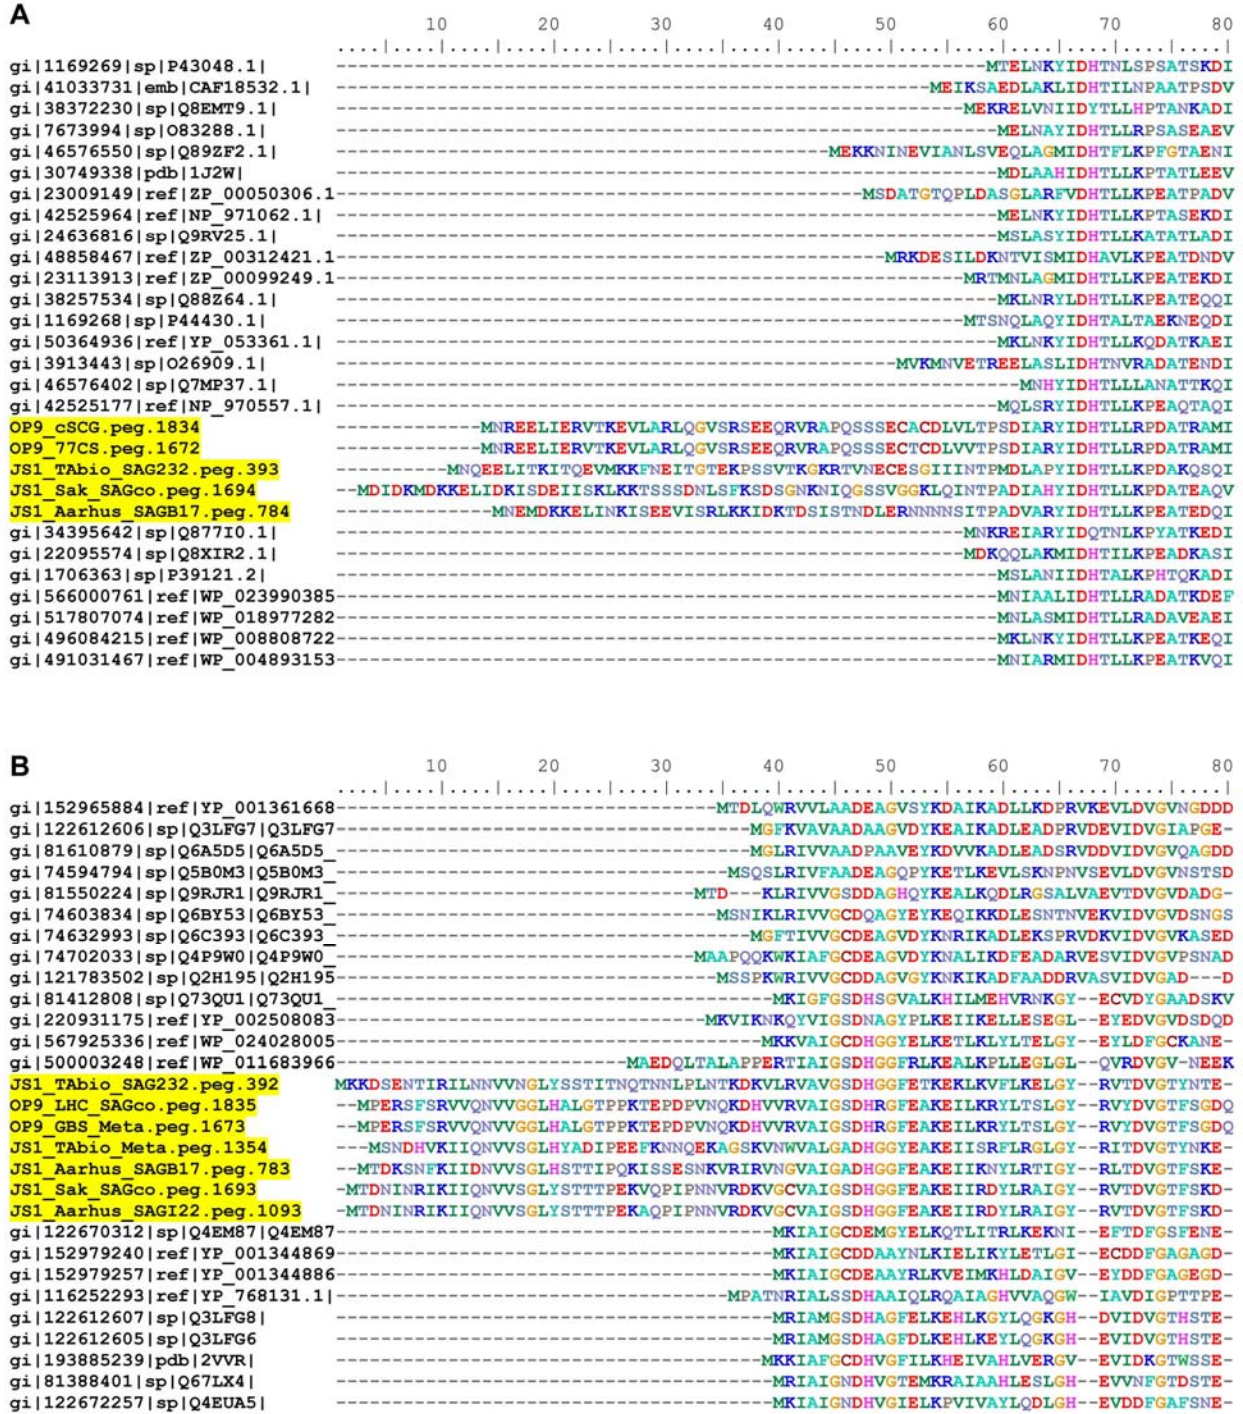

Figure S4. Multiple sequence alignment of predicted N-terminal regions of (A) DERA and (B) ribose-5-phosphate isomerase in OP9 and JS1, which are associated with BMC clusters, and closest homologs (not associated with BMC clusters). Extended N-terminal regions in BMC-

associated sequences suggest that these proteins are targeted to the inside of the BMC (Fan et al., 2010).

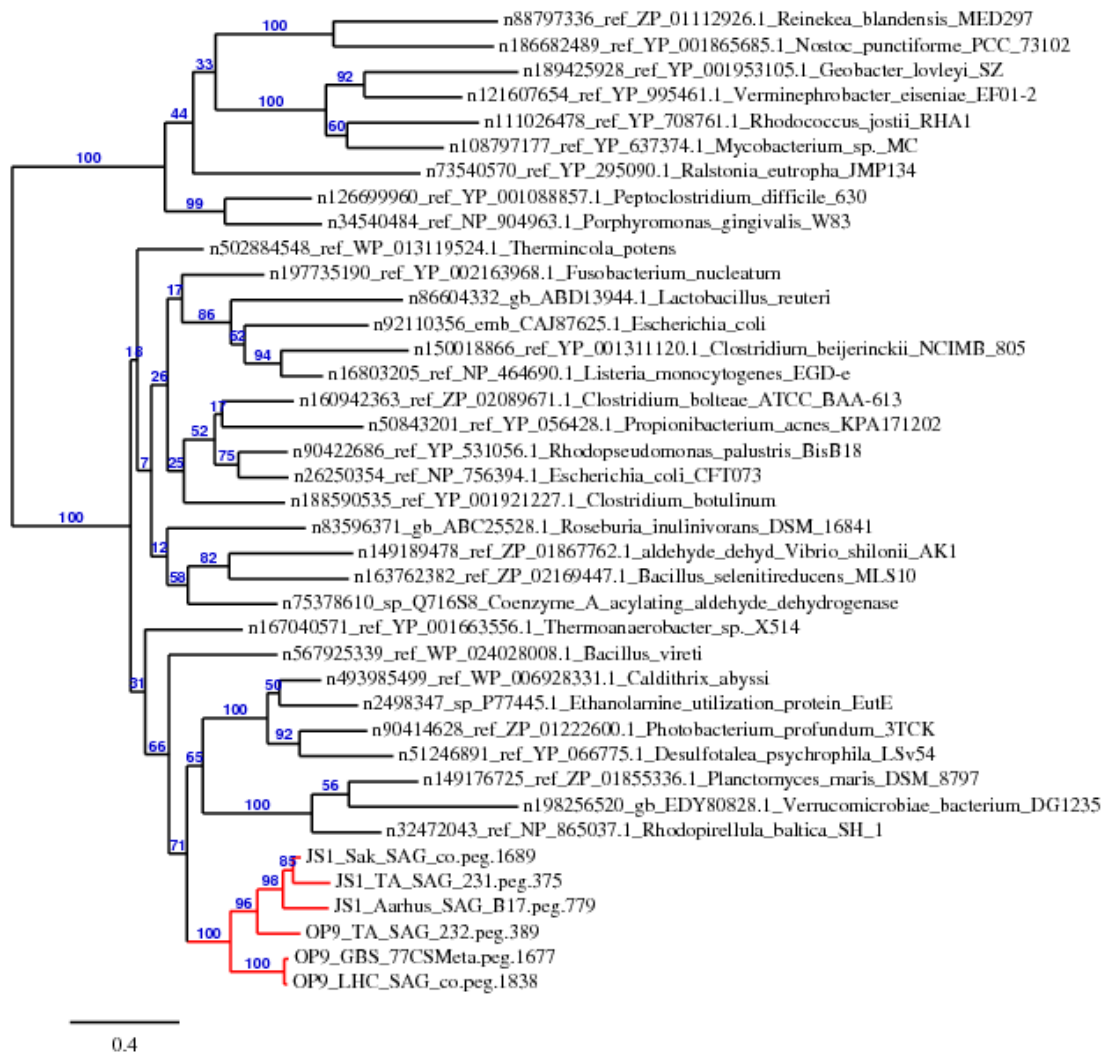

Figure S5. Phylogeny of aldehyde dehydrogenase (conserved domain cd07121) and homologs in 'Atribacteria' BMC clusters (red branches) and other organisms inferred using RAXML. The scale bar indicates the number of changes per position, and blue numbers indicate the bootstrap support (out of 100 pseudoreplicates) for a given node.



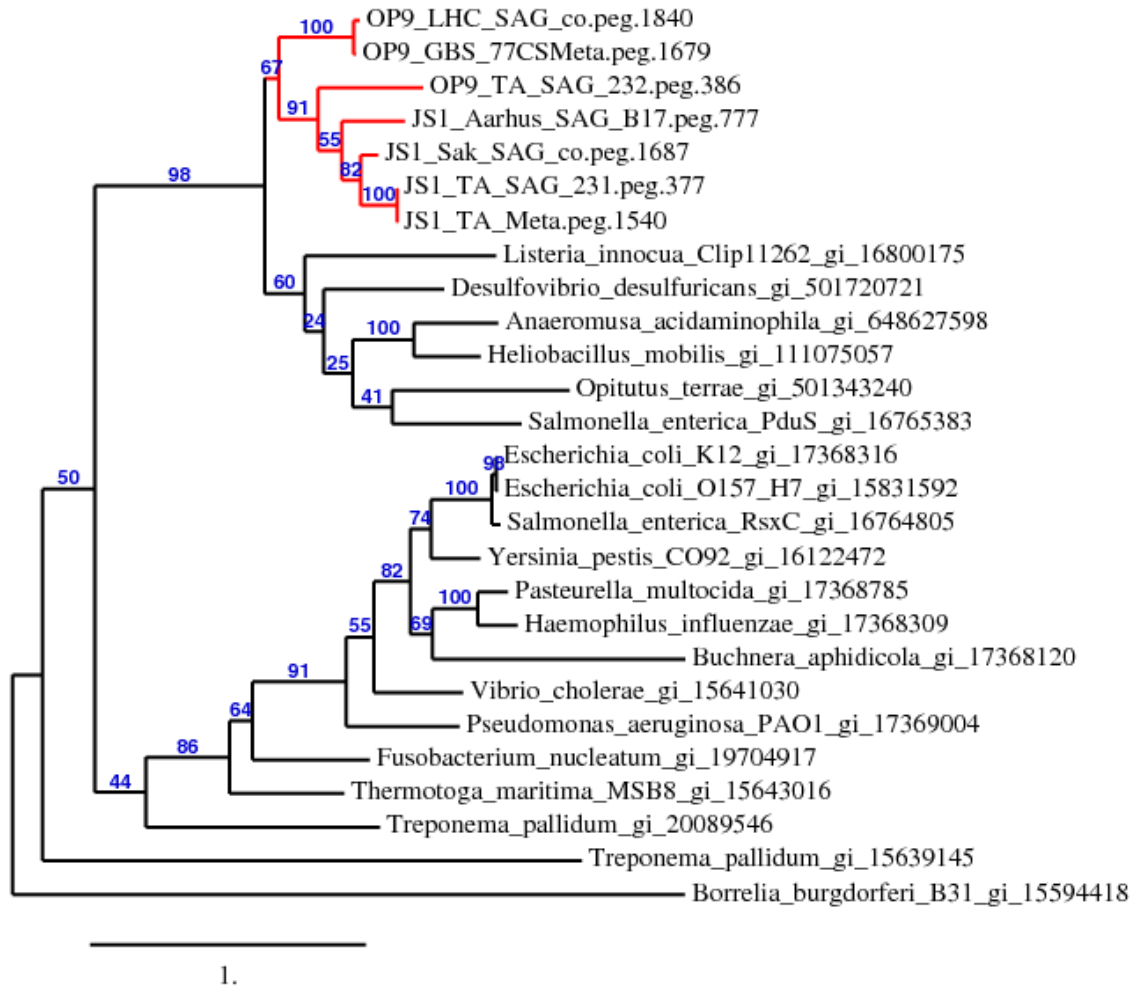

Figure S6. Phylogeny of cobalamin reductase (COG4656) and homologs in 'Atribacteria' BMC clusters (red branches) and other organisms inferred using RAXML. The scale bar indicates the number of changes per position, and blue numbers indicate the bootstrap support (out of 100 pseudoreplicates) for a given node.

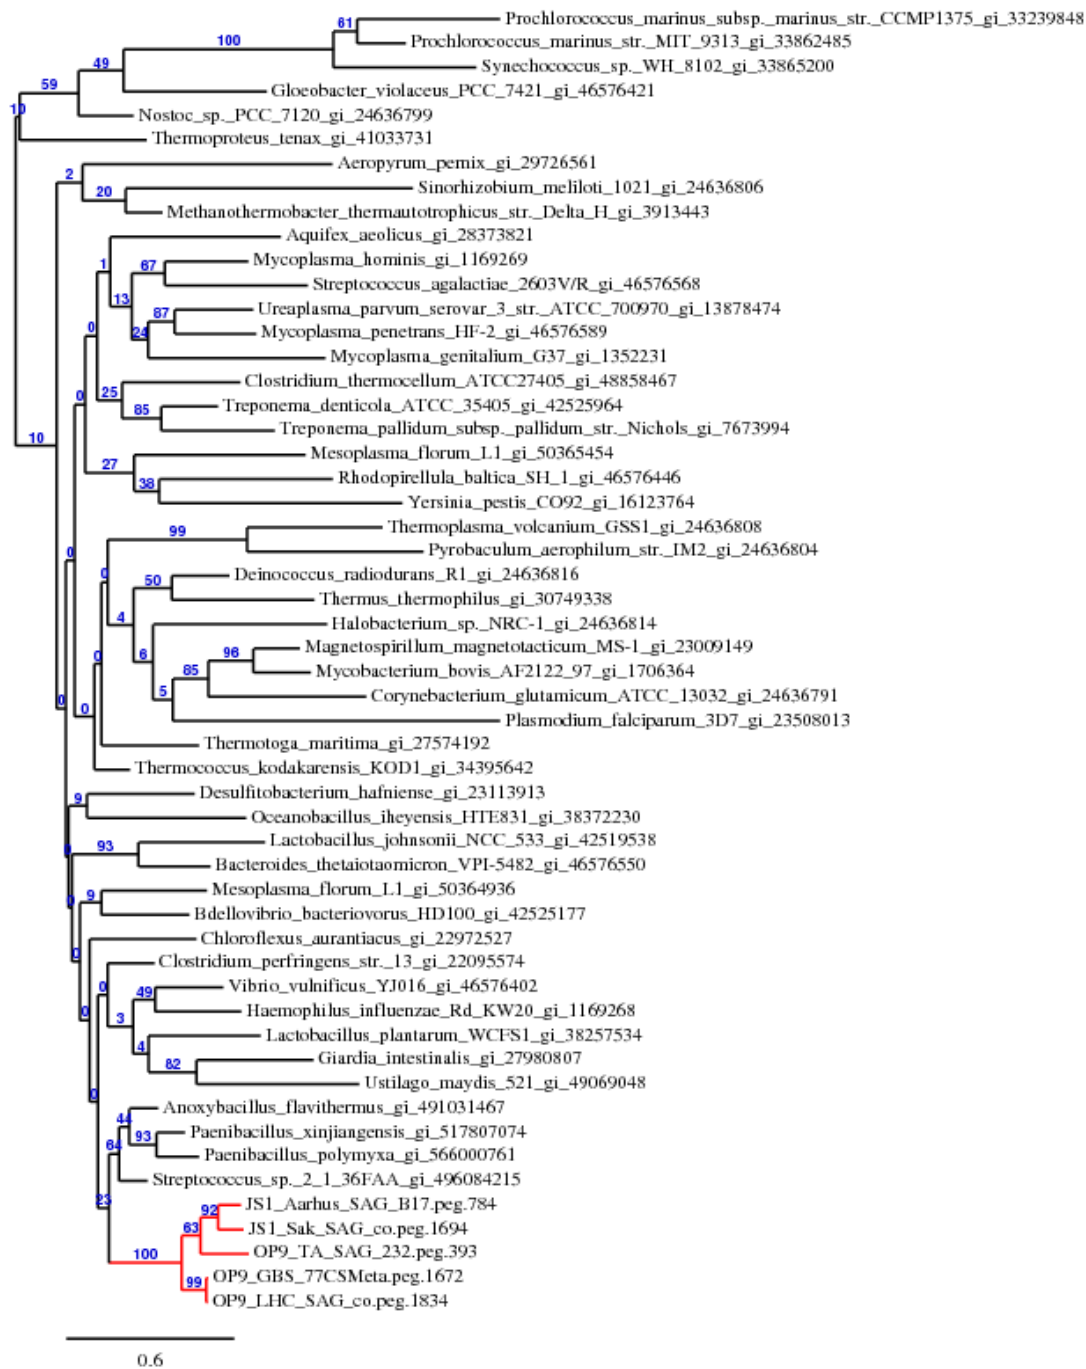

Figure S7. Phylogeny of deoxyribonucleotide aldolase (DERA, conserved domain cd00959) and homologs in 'Atribacteria' BMC clusters (red branches) and other organisms inferred using RAxML. The scale bar indicates the number of changes per position, and blue numbers indicate the bootstrap support (out of 100 pseudoreplicates) for a given node.

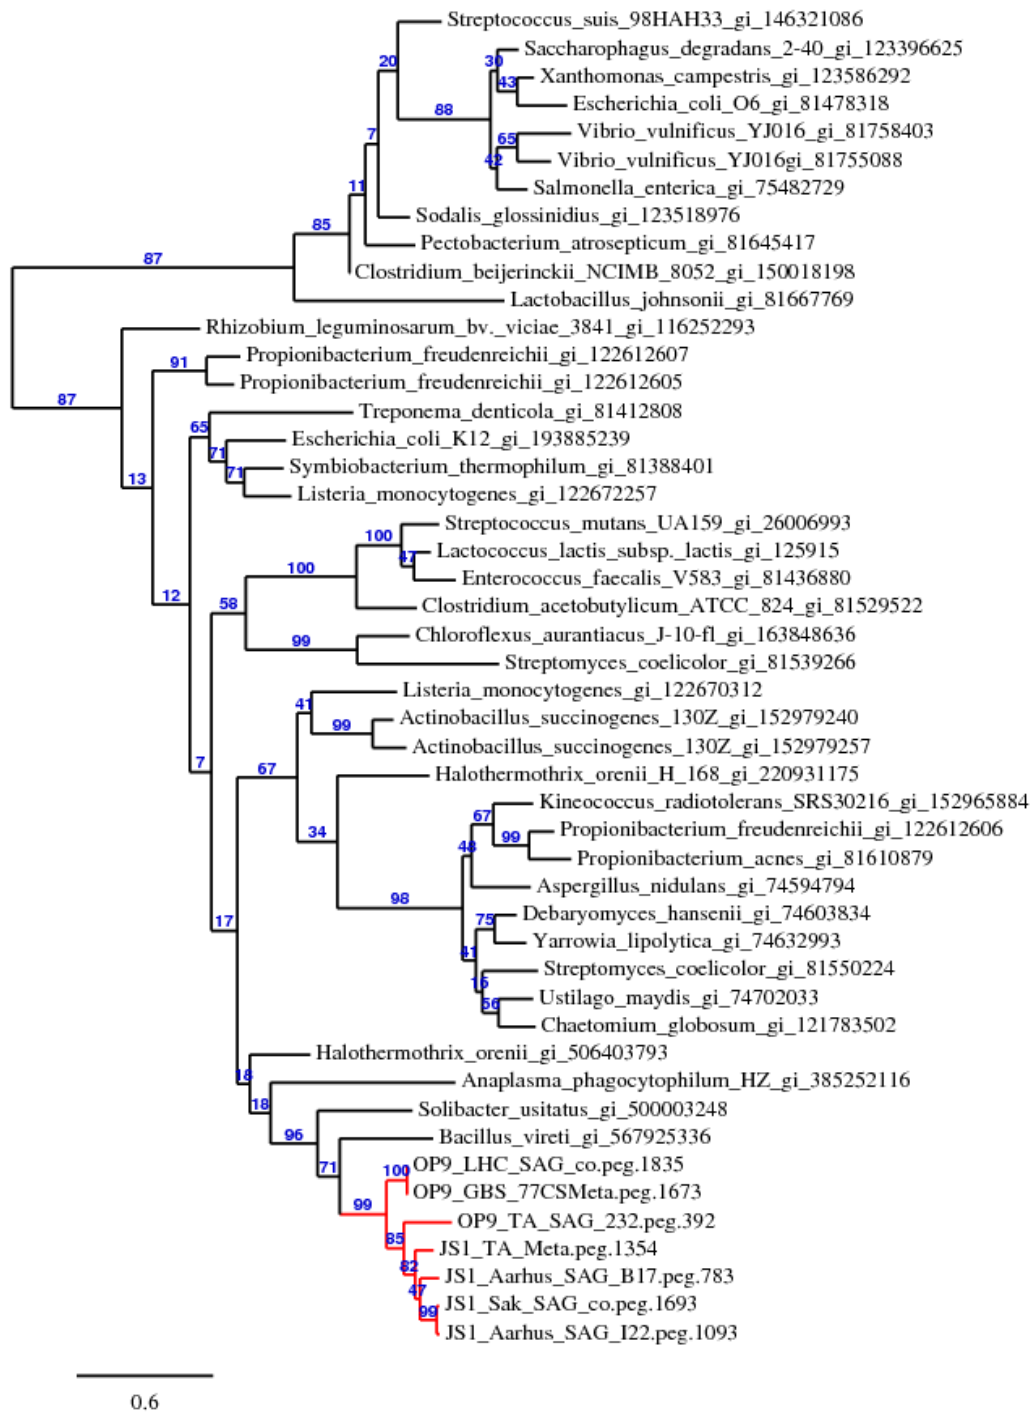

Figure S8. Phylogeny of ribose 5-phosphate isomerase (pfam02502) and homologs in 'Atribacteria' BMC clusters (red branches) and other organisms inferred using RAxML. The scale bar indicates the number of changes per position, and blue numbers indicate the bootstrap support (out of 100 pseudoreplicates) for a given node.

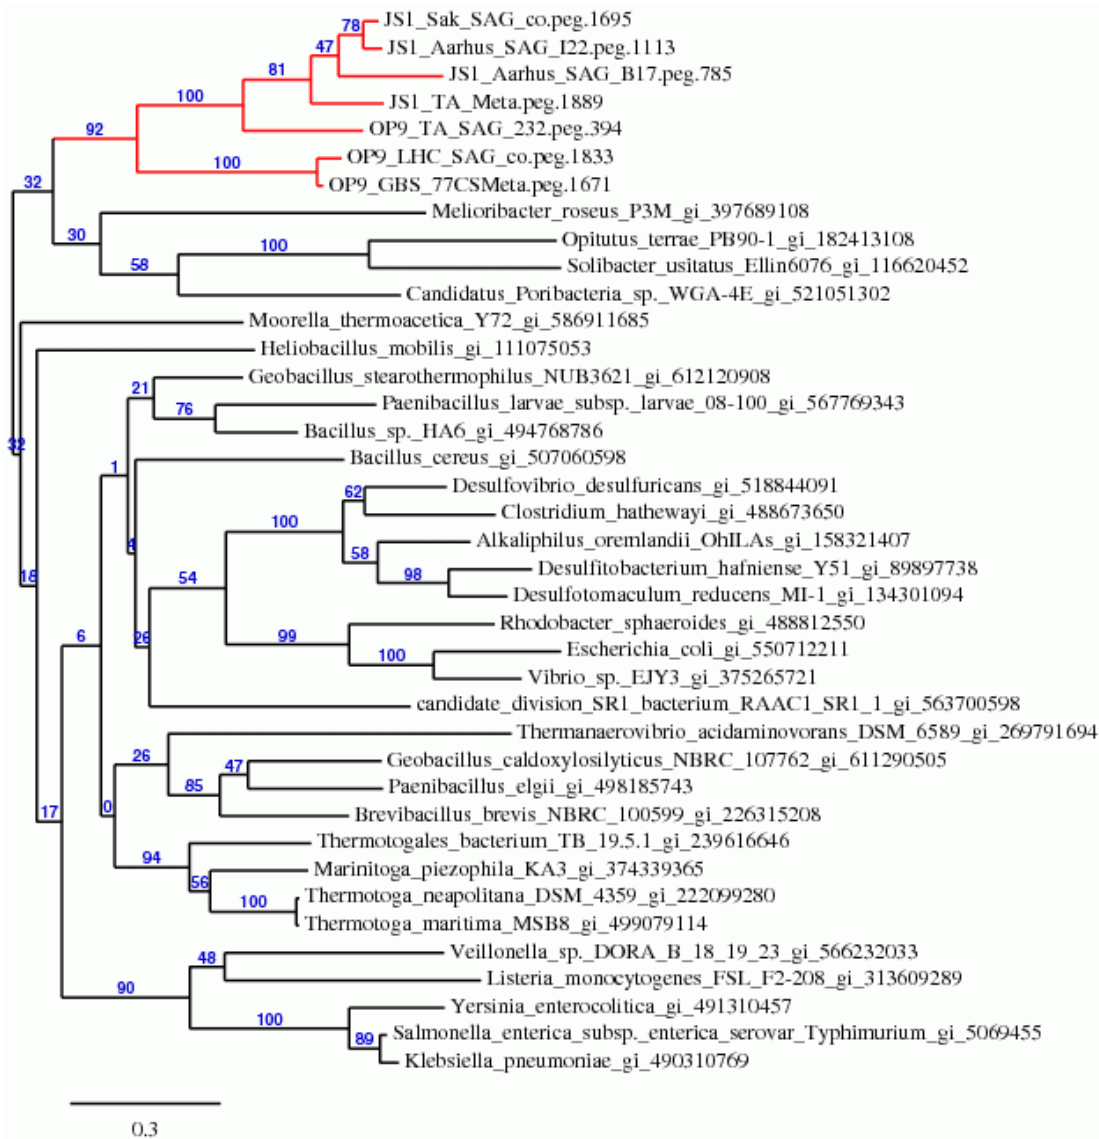

Figure S9. Phylogeny of putative phosphotransacetylase (PduL, pfam06130) and homologs in 'Atribacteria' BMC clusters (red branches) and other organisms inferred using RAxML. The scale bar indicates the number of changes per position, and blue numbers indicate the bootstrap support (out of 100 pseudoreplicates) for a given node.

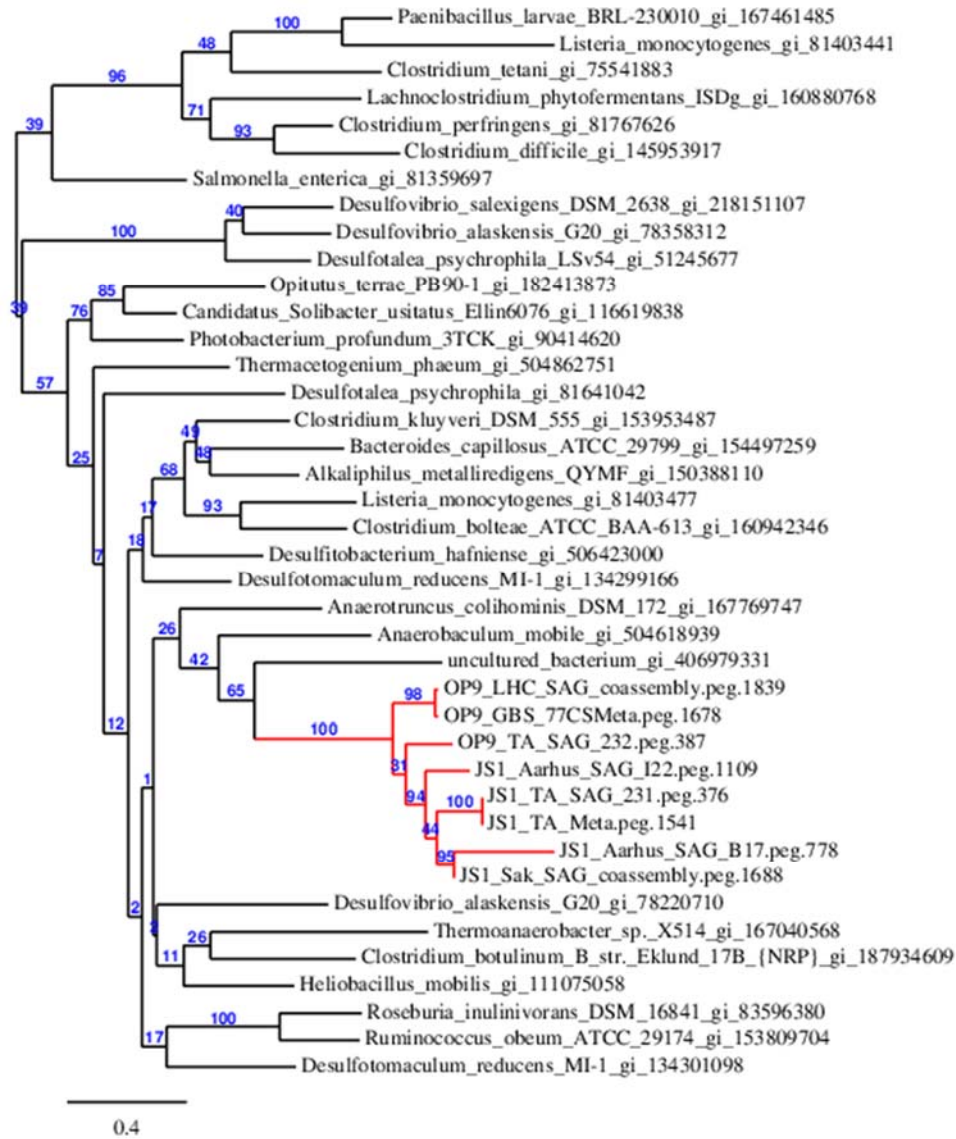

Figure S10. Phylogeny of predicted bacterial microcompartment shell proteins (conserved domains cd07053 and cd07054 in pfam00936) in ‘Atribacteria’ BMC clusters (red branches) and other organisms inferred using RAxML. The scale bar indicates the number of changes per position, and blue numbers indicate the bootstrap support (out of 100 pseudoreplicates) for a given node.

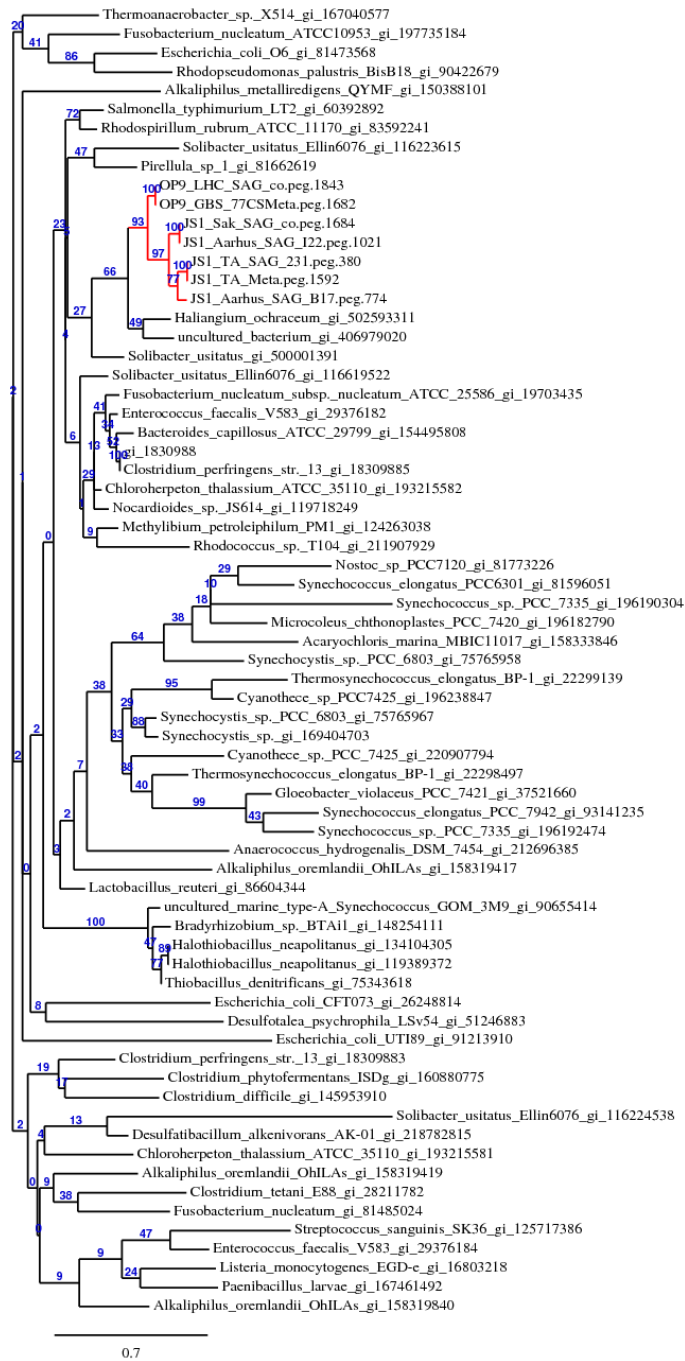

Figure S11. Phylogeny of predicted bacterial microcompartment shell proteins (conserved domain cd07045 in pfam00936) in 'Atribacteria' BMC clusters (red branches) and other organisms inferred using RAXML. The scale bar indicates the number of changes per position, and blue numbers indicate the bootstrap support (out of 100 pseudoreplicates) for a given node.



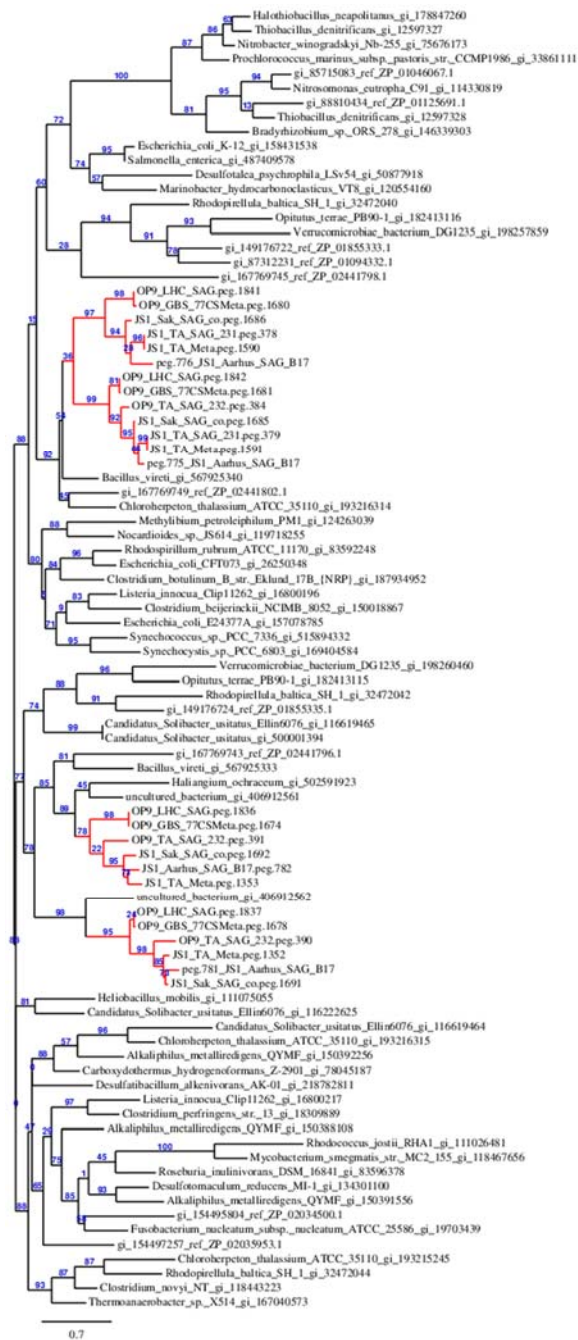

Figure S12. Phylogeny of predicted bacterial microcompartment shell proteins (conserved domain cd01614 in pfam03319) in 'Atribacteria' BMC clusters (red branches) and other organisms inferred using RAxML. The scale bar indicates the number of changes per position, and blue numbers indicate the bootstrap support (out of 100 pseudoreplicates) for a given node.

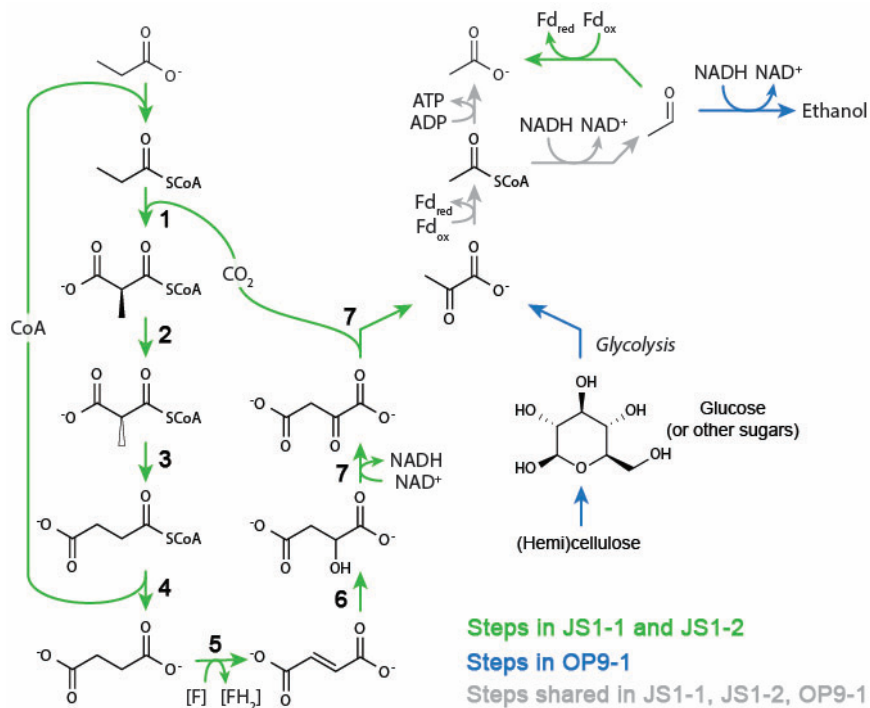

Figure S13. Predicted propionate catabolism pathway in JS1-1 and JS1-2, saccharide fermentation in OP9-1, and shared pyruvate metabolism in 'Atribacteria'. JS1 propionate catabolism (green) is predicted to converge with sugar catabolism of OP9-1 (blue) by production of pyruvate. After pyruvate is oxidatively decarboxylated to acetyl-CoA, the acetyl-CoA can either feed into substrate level phosphorylation or acetaldehyde production within the bacterial microcompartment. JS1-1 and JS1-2 reoxidize acetaldehyde to acetyl-CoA to generate reduced ferredoxin (Fd), while OP9-1 further reduces acetaldehyde to ethanol to dispose of reducing power and regenerate NAD<sup>+</sup>. Enzymes participating in propionate catabolism in JS1-1 and JS1-2 indicated by bold numbers are: 1, methylmalonyl-CoA decarboxylase; 2, methylmalonyl-CoA epimerase; 3, methylmalonyl-CoA mutase; 4, succinyl-CoA synthetase; 5, succinate dehydrogenase/fumarate reductase; 6, fumarate hydratase; 7, malate dehydrogenase (decarboxylating).



Contigs in metagenome bins. Metagenomes are publicly available on IMG/M.

| OP9_GBS_Meta77CS contigs<br>in metagenome 3300000106 | JS1_TA_Meta contigs<br>in metagenome 3300001095 | JS1_Sak_Meta contigs<br>in metagenome 2263328000 |
|------------------------------------------------------|-------------------------------------------------|--------------------------------------------------|
| GBSCECS77c_c1000076                                  | JGI12104J13512_1001551                          | SakLake120mDRAFT_c0001362                        |
| GBSCECS77c_c1000082                                  | JGI12104J13512_1002021                          | SakLake120mDRAFT_c0002315                        |
| GBSCECS77c_c1000092                                  | JGI12104J13512_1002403                          | SakLake120mDRAFT_c0005075                        |
| GBSCECS77c_c1000099                                  | JGI12104J13512_1002522                          | SakLake120mDRAFT_c0006462                        |
| GBSCECS77c_c1000148                                  | JGI12104J13512_1002757                          | SakLake120mDRAFT_c0009265                        |
| GBSCECS77c_c1000154                                  | JGI12104J13512_1003021                          | SakLake120mDRAFT_c0010081                        |
| GBSCECS77c_c1000162                                  | JGI12104J13512_1003169                          | SakLake120mDRAFT_c0010429                        |
| GBSCECS77c_c1000172                                  | JGI12104J13512_1003170                          | SakLake120mDRAFT_c0010471                        |
| GBSCECS77c_c1000195                                  | JGI12104J13512_1003203                          | SakLake120mDRAFT_c0012504                        |
| GBSCECS77c_c1000207                                  | JGI12104J13512_1003227                          | SakLake120mDRAFT_c0012589                        |
| GBSCECS77c_c1000209                                  | JGI12104J13512_1003306                          | SakLake120mDRAFT_c0012635                        |
| GBSCECS77c_c1000217                                  | JGI12104J13512_1003503                          | SakLake120mDRAFT_c0013271                        |
| GBSCECS77c_c1000245                                  | JGI12104J13512_1003571                          | SakLake120mDRAFT_c0014028                        |
| GBSCECS77c_c1000261                                  | JGI12104J13512_1003577                          | SakLake120mDRAFT_c0014553                        |
| GBSCECS77c_c1000268                                  | JGI12104J13512_1003696                          | SakLake120mDRAFT_c0014769                        |
| GBSCECS77c_c1000287                                  | JGI12104J13512_1003743                          | SakLake120mDRAFT_c0015377                        |
| GBSCECS77c_c1000301                                  | JGI12104J13512_1003763                          | SakLake120mDRAFT_c0015975                        |
| GBSCECS77c_c1000315                                  | JGI12104J13512_1003790                          | SakLake120mDRAFT_c0016008                        |
| GBSCECS77c_c1000351                                  | JGI12104J13512_1003866                          | SakLake120mDRAFT_c0016221                        |
| GBSCECS77c_c1000368                                  | JGI12104J13512_1003870                          | SakLake120mDRAFT_c0016355                        |
| GBSCECS77c_c1000376                                  | JGI12104J13512_1003892                          | SakLake120mDRAFT_c0016773                        |
| GBSCECS77c_c1000392                                  | JGI12104J13512_1003957                          | SakLake120mDRAFT_c0017202                        |
| GBSCECS77c_c1000394                                  | JGI12104J13512_1003974                          | SakLake120mDRAFT_c0018615                        |
| GBSCECS77c_c1000402                                  | JGI12104J13512_1004035                          | SakLake120mDRAFT_c0018747                        |
| GBSCECS77c_c1000410                                  | JGI12104J13512_1004058                          | SakLake120mDRAFT_c0019226                        |
| GBSCECS77c_c1000422                                  | JGI12104J13512_1004116                          | SakLake120mDRAFT_c0019938                        |
| GBSCECS77c_c1000423                                  | JGI12104J13512_1004139                          | SakLake120mDRAFT_c0020030                        |
| GBSCECS77c_c1000442                                  | JGI12104J13512_1004154                          | SakLake120mDRAFT_c0020241                        |
| GBSCECS77c_c1000448                                  | JGI12104J13512_1004384                          | SakLake120mDRAFT_c0020352                        |
| GBSCECS77c_c1000449                                  | JGI12104J13512_1004425                          | SakLake120mDRAFT_c0020513                        |
| GBSCECS77c_c1000451                                  | JGI12104J13512_1004465                          | SakLake120mDRAFT_c0021152                        |
| GBSCECS77c_c1000475                                  | JGI12104J13512_1004573                          | SakLake120mDRAFT_c0021197                        |
| GBSCECS77c_c1000513                                  | JGI12104J13512_1004802                          | SakLake120mDRAFT_c0021232                        |
| GBSCECS77c_c1000515                                  | JGI12104J13512_1004817                          | SakLake120mDRAFT_c0021340                        |
| GBSCECS77c_c1000516                                  | JGI12104J13512_1004846                          | SakLake120mDRAFT_c0021481                        |
| GBSCECS77c_c1000528                                  | JGI12104J13512_1004862                          | SakLake120mDRAFT_c0021487                        |
| GBSCECS77c_c1000540                                  | JGI12104J13512_1004901                          | SakLake120mDRAFT_c0021730                        |
| GBSCECS77c_c1000548                                  | JGI12104J13512_1005002                          | SakLake120mDRAFT_c0022030                        |
| GBSCECS77c_c1000551                                  | JGI12104J13512_1005012                          | SakLake120mDRAFT_c0022043                        |

|                     |                        |                           |
|---------------------|------------------------|---------------------------|
| GBSCECS77c_c1000588 | JGI12104J13512_1005086 | SakLake120mDRAFT_c0022047 |
| GBSCECS77c_c1000610 | JGI12104J13512_1005099 | SakLake120mDRAFT_c0022541 |
| GBSCECS77c_c1000611 | JGI12104J13512_1005118 | SakLake120mDRAFT_c0022601 |
| GBSCECS77c_c1000641 | JGI12104J13512_1005234 | SakLake120mDRAFT_c0022630 |
| GBSCECS77c_c1000653 | JGI12104J13512_1005265 | SakLake120mDRAFT_c0022816 |
| GBSCECS77c_c1000672 | JGI12104J13512_1005275 | SakLake120mDRAFT_c0022977 |
| GBSCECS77c_c1000715 | JGI12104J13512_1005289 | SakLake120mDRAFT_c0023061 |
| GBSCECS77c_c1000716 | JGI12104J13512_1005331 | SakLake120mDRAFT_c0023419 |
| GBSCECS77c_c1000744 | JGI12104J13512_1005492 | SakLake120mDRAFT_c0023665 |
| GBSCECS77c_c1000749 | JGI12104J13512_1005506 | SakLake120mDRAFT_c0023987 |
| GBSCECS77c_c1000753 | JGI12104J13512_1005521 | SakLake120mDRAFT_c0024056 |
| GBSCECS77c_c1000781 | JGI12104J13512_1005637 | SakLake120mDRAFT_c0024156 |
| GBSCECS77c_c1000794 | JGI12104J13512_1005689 | SakLake120mDRAFT_c0024208 |
| GBSCECS77c_c1000797 | JGI12104J13512_1005694 | SakLake120mDRAFT_c0024233 |
| GBSCECS77c_c1000798 | JGI12104J13512_1005696 | SakLake120mDRAFT_c0024577 |
| GBSCECS77c_c1000806 | JGI12104J13512_1005698 | SakLake120mDRAFT_c0024612 |
| GBSCECS77c_c1000812 | JGI12104J13512_1005722 | SakLake120mDRAFT_c0024662 |
| GBSCECS77c_c1000827 | JGI12104J13512_1005753 | SakLake120mDRAFT_c0025026 |
| GBSCECS77c_c1000830 | JGI12104J13512_1005783 | SakLake120mDRAFT_c0025123 |
| GBSCECS77c_c1000892 | JGI12104J13512_1005788 | SakLake120mDRAFT_c0025356 |
| GBSCECS77c_c1000897 | JGI12104J13512_1006049 | SakLake120mDRAFT_c0025669 |
| GBSCECS77c_c1000919 | JGI12104J13512_1006051 | SakLake120mDRAFT_c0026036 |
| GBSCECS77c_c1000927 | JGI12104J13512_1006144 | SakLake120mDRAFT_c0026266 |
| GBSCECS77c_c1000941 | JGI12104J13512_1006146 | SakLake120mDRAFT_c0026529 |
| GBSCECS77c_c1000951 | JGI12104J13512_1006157 | SakLake120mDRAFT_c0026927 |
| GBSCECS77c_c1001005 | JGI12104J13512_1006159 | SakLake120mDRAFT_c0027243 |
| GBSCECS77c_c1001026 | JGI12104J13512_1006166 | SakLake120mDRAFT_c0027302 |
| GBSCECS77c_c1001054 | JGI12104J13512_1006182 | SakLake120mDRAFT_c0027327 |
| GBSCECS77c_c1001069 | JGI12104J13512_1006229 | SakLake120mDRAFT_c0027525 |
| GBSCECS77c_c1001100 | JGI12104J13512_1006270 | SakLake120mDRAFT_c0027604 |
| GBSCECS77c_c1001122 | JGI12104J13512_1006306 | SakLake120mDRAFT_c0027634 |
| GBSCECS77c_c1001134 | JGI12104J13512_1006332 | SakLake120mDRAFT_c0027649 |
| GBSCECS77c_c1001146 | JGI12104J13512_1006349 | SakLake120mDRAFT_c0027736 |
| GBSCECS77c_c1001247 | JGI12104J13512_1006392 | SakLake120mDRAFT_c0027807 |
| GBSCECS77c_c1001252 | JGI12104J13512_1006427 | SakLake120mDRAFT_c0028204 |
| GBSCECS77c_c1001253 | JGI12104J13512_1006472 | SakLake120mDRAFT_c0028215 |
| GBSCECS77c_c1001272 | JGI12104J13512_1006473 | SakLake120mDRAFT_c0028459 |
| GBSCECS77c_c1001279 | JGI12104J13512_1006492 | SakLake120mDRAFT_c0028477 |
| GBSCECS77c_c1001281 | JGI12104J13512_1006525 | SakLake120mDRAFT_c0028495 |
| GBSCECS77c_c1001315 | JGI12104J13512_1006539 | SakLake120mDRAFT_c0028523 |
| GBSCECS77c_c1001327 | JGI12104J13512_1006540 | SakLake120mDRAFT_c0028553 |
| GBSCECS77c_c1001333 | JGI12104J13512_1006543 | SakLake120mDRAFT_c0028709 |
| GBSCECS77c_c1001372 | JGI12104J13512_1006578 | SakLake120mDRAFT_c0028920 |

|                     |                        |                           |
|---------------------|------------------------|---------------------------|
| GBSCECS77c_c1001383 | JGI12104J13512_1006580 | SakLake120mDRAFT_c0029160 |
| GBSCECS77c_c1001387 | JGI12104J13512_1006588 | SakLake120mDRAFT_c0029765 |
| GBSCECS77c_c1001510 | JGI12104J13512_1006599 | SakLake120mDRAFT_c0030313 |
| GBSCECS77c_c1001528 | JGI12104J13512_1006600 | SakLake120mDRAFT_c0030510 |
| GBSCECS77c_c1001531 | JGI12104J13512_1006624 | SakLake120mDRAFT_c0030916 |
| GBSCECS77c_c1001730 | JGI12104J13512_1006632 | SakLake120mDRAFT_c0030969 |
| GBSCECS77c_c1001734 | JGI12104J13512_1006652 | SakLake120mDRAFT_c0031373 |
| GBSCECS77c_c1001745 | JGI12104J13512_1006655 | SakLake120mDRAFT_c0031389 |
| GBSCECS77c_c1001761 | JGI12104J13512_1006672 | SakLake120mDRAFT_c0031546 |
| GBSCECS77c_c1001779 | JGI12104J13512_1006692 | SakLake120mDRAFT_c0032745 |
| GBSCECS77c_c1001809 | JGI12104J13512_1006769 | SakLake120mDRAFT_c0033291 |
| GBSCECS77c_c1001845 | JGI12104J13512_1006778 | SakLake120mDRAFT_c0035900 |
| GBSCECS77c_c1001967 | JGI12104J13512_1006804 | SakLake120mDRAFT_c0036016 |
| GBSCECS77c_c1001978 | JGI12104J13512_1006819 | SakLake120mDRAFT_c0037333 |
| GBSCECS77c_c1002063 | JGI12104J13512_1006837 | SakLake120mDRAFT_c0039603 |
| GBSCECS77c_c1002090 | JGI12104J13512_1006843 | SakLake120mDRAFT_c0040528 |
| GBSCECS77c_c1002106 | JGI12104J13512_1006970 | SakLake120mDRAFT_c0041501 |
| GBSCECS77c_c1002113 | JGI12104J13512_1006994 | SakLake120mDRAFT_c0041795 |
| GBSCECS77c_c1002164 | JGI12104J13512_1007014 | SakLake120mDRAFT_c0042986 |
| GBSCECS77c_c1002175 | JGI12104J13512_1007037 | SakLake120mDRAFT_c0043924 |
| GBSCECS77c_c1002177 | JGI12104J13512_1007129 | SakLake120mDRAFT_c0044026 |
| GBSCECS77c_c1002265 | JGI12104J13512_1007148 | SakLake120mDRAFT_c0044236 |
| GBSCECS77c_c1002270 | JGI12104J13512_1007154 | SakLake120mDRAFT_c0044929 |
| GBSCECS77c_c1002292 | JGI12104J13512_1007201 | SakLake120mDRAFT_c0044946 |
| GBSCECS77c_c1002351 | JGI12104J13512_1007205 | SakLake120mDRAFT_c0045142 |
| GBSCECS77c_c1002389 | JGI12104J13512_1007228 | SakLake120mDRAFT_c0045428 |
| GBSCECS77c_c1002514 | JGI12104J13512_1007297 | SakLake120mDRAFT_c0046759 |
| GBSCECS77c_c1002563 | JGI12104J13512_1007315 | SakLake120mDRAFT_c0048071 |
| GBSCECS77c_c1002616 | JGI12104J13512_1007422 | SakLake120mDRAFT_c0048800 |
| GBSCECS77c_c1002647 | JGI12104J13512_1007427 | SakLake120mDRAFT_c0050472 |
| GBSCECS77c_c1002659 | JGI12104J13512_1007482 | SakLake120mDRAFT_c0050640 |
| GBSCECS77c_c1002692 | JGI12104J13512_1007496 | SakLake120mDRAFT_c0051191 |
| GBSCECS77c_c1002764 | JGI12104J13512_1007519 | SakLake120mDRAFT_c0051210 |
| GBSCECS77c_c1002788 | JGI12104J13512_1007536 | SakLake120mDRAFT_c0051393 |
| GBSCECS77c_c1002900 | JGI12104J13512_1007563 | SakLake120mDRAFT_c0052215 |
| GBSCECS77c_c1002931 | JGI12104J13512_1007566 | SakLake120mDRAFT_c0052216 |
| GBSCECS77c_c1002979 | JGI12104J13512_1007570 | SakLake120mDRAFT_c0052410 |
| GBSCECS77c_c1003193 | JGI12104J13512_1007575 | SakLake120mDRAFT_c0052462 |
| GBSCECS77c_c1003280 | JGI12104J13512_1007576 | SakLake120mDRAFT_c0052558 |
| GBSCECS77c_c1003633 | JGI12104J13512_1007610 | SakLake120mDRAFT_c0052831 |
| GBSCECS77c_c1003639 | JGI12104J13512_1007625 | SakLake120mDRAFT_c0055046 |
| GBSCECS77c_c1003732 | JGI12104J13512_1007655 | SakLake120mDRAFT_c0055338 |
| GBSCECS77c_c1003860 | JGI12104J13512_1007708 | SakLake120mDRAFT_c0056371 |

|                     |                        |                           |
|---------------------|------------------------|---------------------------|
| GBSCECS77c_c1004052 | JGI12104J13512_1007718 | SakLake120mDRAFT_c0056529 |
| GBSCECS77c_c1004078 | JGI12104J13512_1007752 | SakLake120mDRAFT_c0056908 |
| GBSCECS77c_c1004268 | JGI12104J13512_1007762 | SakLake120mDRAFT_c0059439 |
| GBSCECS77c_c1004334 | JGI12104J13512_1007784 | SakLake120mDRAFT_c0059460 |
| GBSCECS77c_c1004753 | JGI12104J13512_1007823 | SakLake120mDRAFT_c0060996 |
| GBSCECS77c_c1004795 | JGI12104J13512_1007888 | SakLake120mDRAFT_c0061020 |
| GBSCECS77c_c1004921 | JGI12104J13512_1007939 | SakLake120mDRAFT_c0061525 |
| GBSCECS77c_c1004967 | JGI12104J13512_1007944 | SakLake120mDRAFT_c0062157 |
| GBSCECS77c_c1005028 | JGI12104J13512_1007949 | SakLake120mDRAFT_c0062503 |
| GBSCECS77c_c1005117 | JGI12104J13512_1007978 | SakLake120mDRAFT_c0062886 |
| GBSCECS77c_c1005279 | JGI12104J13512_1008022 | SakLake120mDRAFT_c0064317 |
| GBSCECS77c_c1005327 | JGI12104J13512_1008034 | SakLake120mDRAFT_c0064373 |
| GBSCECS77c_c1005457 | JGI12104J13512_1008046 | SakLake120mDRAFT_c0065022 |
| GBSCECS77c_c1005755 | JGI12104J13512_1008054 | SakLake120mDRAFT_c0065300 |
| GBSCECS77c_c1006083 | JGI12104J13512_1008067 | SakLake120mDRAFT_c0066940 |
| GBSCECS77c_c1006593 | JGI12104J13512_1008085 | SakLake120mDRAFT_c0067752 |
| GBSCECS77c_c1006800 | JGI12104J13512_1008091 | SakLake120mDRAFT_c0068071 |
| GBSCECS77c_c1007127 | JGI12104J13512_1008129 | SakLake120mDRAFT_c0069133 |
| GBSCECS77c_c1007183 | JGI12104J13512_1008205 | SakLake120mDRAFT_c0069305 |
| GBSCECS77c_c1007627 | JGI12104J13512_1008214 | SakLake120mDRAFT_c0069935 |
| GBSCECS77c_c1008253 | JGI12104J13512_1008231 | SakLake120mDRAFT_c0069987 |
| GBSCECS77c_c1008582 | JGI12104J13512_1008242 | SakLake120mDRAFT_c0071257 |
| GBSCECS77c_c1008828 | JGI12104J13512_1008292 | SakLake120mDRAFT_c0072807 |
| GBSCECS77c_c1009168 | JGI12104J13512_1008348 | SakLake120mDRAFT_c0073154 |
| GBSCECS77c_c1009204 | JGI12104J13512_1008387 | SakLake120mDRAFT_c0074168 |
| GBSCECS77c_c1009412 | JGI12104J13512_1008404 |                           |
| GBSCECS77c_c1009445 | JGI12104J13512_1008533 |                           |
| GBSCECS77c_c1013567 | JGI12104J13512_1008534 |                           |
|                     | JGI12104J13512_1008543 |                           |
|                     | JGI12104J13512_1008563 |                           |
|                     | JGI12104J13512_1008582 |                           |
|                     | JGI12104J13512_1008583 |                           |
|                     | JGI12104J13512_1008683 |                           |
|                     | JGI12104J13512_1008714 |                           |
|                     | JGI12104J13512_1008750 |                           |
|                     | JGI12104J13512_1008790 |                           |
|                     | JGI12104J13512_1008861 |                           |
|                     | JGI12104J13512_1008864 |                           |
|                     | JGI12104J13512_1008879 |                           |
|                     | JGI12104J13512_1008887 |                           |
|                     | JGI12104J13512_1008893 |                           |
|                     | JGI12104J13512_1008894 |                           |
|                     | JGI12104J13512_1008904 |                           |

JGI12104J13512\_1008926  
JGI12104J13512\_1008955  
JGI12104J13512\_1008957  
JGI12104J13512\_1009007  
JGI12104J13512\_1009024  
JGI12104J13512\_1009038  
JGI12104J13512\_1009048  
JGI12104J13512\_1009172  
JGI12104J13512\_1009179  
JGI12104J13512\_1009193  
JGI12104J13512\_1009221  
JGI12104J13512\_1009243  
JGI12104J13512\_1009280  
JGI12104J13512\_1009306  
JGI12104J13512\_1009315  
JGI12104J13512\_1009345  
JGI12104J13512\_1009350  
JGI12104J13512\_1009355  
JGI12104J13512\_1009420  
JGI12104J13512\_1009433  
JGI12104J13512\_1009526  
JGI12104J13512\_1009528  
JGI12104J13512\_1009540  
JGI12104J13512\_1009542  
JGI12104J13512\_1009550  
JGI12104J13512\_1009553  
JGI12104J13512\_1009558  
JGI12104J13512\_1009629  
JGI12104J13512\_1009630  
JGI12104J13512\_1009674  
JGI12104J13512\_1009677  
JGI12104J13512\_1009681  
JGI12104J13512\_1009749  
JGI12104J13512\_1009751  
JGI12104J13512\_1009824  
JGI12104J13512\_1009907  
JGI12104J13512\_1009918  
JGI12104J13512\_1009993  
JGI12104J13512\_1010000  
JGI12104J13512\_1010021  
JGI12104J13512\_1010033  
JGI12104J13512\_1010040  
JGI12104J13512\_1010050

JGI12104J13512\_1010066  
JGI12104J13512\_1010111  
JGI12104J13512\_1010114  
JGI12104J13512\_1010127  
JGI12104J13512\_1010143  
JGI12104J13512\_1010166  
JGI12104J13512\_1010174  
JGI12104J13512\_1010203  
JGI12104J13512\_1010259  
JGI12104J13512\_1010343  
JGI12104J13512\_1010345  
JGI12104J13512\_1010347  
JGI12104J13512\_1010356  
JGI12104J13512\_1010378  
JGI12104J13512\_1010403  
JGI12104J13512\_1010495  
JGI12104J13512\_1010511  
JGI12104J13512\_1010525  
JGI12104J13512\_1010531  
JGI12104J13512\_1010578  
JGI12104J13512\_1010651  
JGI12104J13512\_1010658  
JGI12104J13512\_1010664  
JGI12104J13512\_1010666  
JGI12104J13512\_1010697  
JGI12104J13512\_1010789  
JGI12104J13512\_1010837  
JGI12104J13512\_1010893  
JGI12104J13512\_1010931  
JGI12104J13512\_1010935  
JGI12104J13512\_1011022  
JGI12104J13512\_1011046  
JGI12104J13512\_1011115  
JGI12104J13512\_1011127  
JGI12104J13512\_1011199  
JGI12104J13512\_1011301  
JGI12104J13512\_1011368  
JGI12104J13512\_1011370  
JGI12104J13512\_1011400  
JGI12104J13512\_1011427  
JGI12104J13512\_1011490  
JGI12104J13512\_1011543  
JGI12104J13512\_1011556

JGI12104J13512\_1011639  
JGI12104J13512\_1011640  
JGI12104J13512\_1011650  
JGI12104J13512\_1011657  
JGI12104J13512\_1011667  
JGI12104J13512\_1011757  
JGI12104J13512\_1011763  
JGI12104J13512\_1011782  
JGI12104J13512\_1011789  
JGI12104J13512\_1011844  
JGI12104J13512\_1011902  
JGI12104J13512\_1011910  
JGI12104J13512\_1011912  
JGI12104J13512\_1011988  
JGI12104J13512\_1012014  
JGI12104J13512\_1012035  
JGI12104J13512\_1012048  
JGI12104J13512\_1012060  
JGI12104J13512\_1012073  
JGI12104J13512\_1012150  
JGI12104J13512\_1012157  
JGI12104J13512\_1012167  
JGI12104J13512\_1012187  
JGI12104J13512\_1012228  
JGI12104J13512\_1012236  
JGI12104J13512\_1012283  
JGI12104J13512\_1012300  
JGI12104J13512\_1012313  
JGI12104J13512\_1012315  
JGI12104J13512\_1012320  
JGI12104J13512\_1012343  
JGI12104J13512\_1012346  
JGI12104J13512\_1012384  
JGI12104J13512\_1012388  
JGI12104J13512\_1012417  
JGI12104J13512\_1012497  
JGI12104J13512\_1012531  
JGI12104J13512\_1012543  
JGI12104J13512\_1012555  
JGI12104J13512\_1012639  
JGI12104J13512\_1012677  
JGI12104J13512\_1012735  
JGI12104J13512\_1012753

JGI12104J13512\_1012795  
JGI12104J13512\_1012803  
JGI12104J13512\_1012814  
JGI12104J13512\_1012838  
JGI12104J13512\_1012876  
JGI12104J13512\_1012889  
JGI12104J13512\_1012920  
JGI12104J13512\_1012932  
JGI12104J13512\_1012933  
JGI12104J13512\_1012952  
JGI12104J13512\_1012955  
JGI12104J13512\_1012986  
JGI12104J13512\_1013038  
JGI12104J13512\_1013050  
JGI12104J13512\_1013060  
JGI12104J13512\_1013066  
JGI12104J13512\_1013084  
JGI12104J13512\_1013106  
JGI12104J13512\_1013152  
JGI12104J13512\_1013183  
JGI12104J13512\_1013185  
JGI12104J13512\_1013190  
JGI12104J13512\_1013264  
JGI12104J13512\_1013294  
JGI12104J13512\_1013302  
JGI12104J13512\_1013359  
JGI12104J13512\_1013375  
JGI12104J13512\_1013391  
JGI12104J13512\_1013398  
JGI12104J13512\_1013422  
JGI12104J13512\_1013467  
JGI12104J13512\_1013470  
JGI12104J13512\_1013498  
JGI12104J13512\_1013564  
JGI12104J13512\_1013609  
JGI12104J13512\_1013614  
JGI12104J13512\_1013617  
JGI12104J13512\_1013625  
JGI12104J13512\_1013647  
JGI12104J13512\_1013669  
JGI12104J13512\_1013679  
JGI12104J13512\_1013737  
JGI12104J13512\_1013742



JGI12104J13512\_1013768  
JGI12104J13512\_1013823  
JGI12104J13512\_1013833  
JGI12104J13512\_1013874  
JGI12104J13512\_1013930  
JGI12104J13512\_1013944  
JGI12104J13512\_1013960  
JGI12104J13512\_1013983  
JGI12104J13512\_1013995  
JGI12104J13512\_1014022  
JGI12104J13512\_1014025  
JGI12104J13512\_1014049  
JGI12104J13512\_1014055  
JGI12104J13512\_1014077  
JGI12104J13512\_1014088  
JGI12104J13512\_1014099  
JGI12104J13512\_1014137  
JGI12104J13512\_1014167  
JGI12104J13512\_1014170  
JGI12104J13512\_1014183  
JGI12104J13512\_1014204  
JGI12104J13512\_1014210  
JGI12104J13512\_1014221  
JGI12104J13512\_1014227  
JGI12104J13512\_1014261  
JGI12104J13512\_1014293  
JGI12104J13512\_1014336  
JGI12104J13512\_1014337  
JGI12104J13512\_1014342  
JGI12104J13512\_1014367  
JGI12104J13512\_1014384  
JGI12104J13512\_1014432  
JGI12104J13512\_1014449  
JGI12104J13512\_1014553  
JGI12104J13512\_1014561  
JGI12104J13512\_1014655  
JGI12104J13512\_1014656  
JGI12104J13512\_1014715  
JGI12104J13512\_1014726  
JGI12104J13512\_1014736  
JGI12104J13512\_1014738  
JGI12104J13512\_1014755  
JGI12104J13512\_1014767

JGI12104J13512\_1014791  
JGI12104J13512\_1014800  
JGI12104J13512\_1014863  
JGI12104J13512\_1014881  
JGI12104J13512\_1014894  
JGI12104J13512\_1014951  
JGI12104J13512\_1014957  
JGI12104J13512\_1015006  
JGI12104J13512\_1015068  
JGI12104J13512\_1015071  
JGI12104J13512\_1015246  
JGI12104J13512\_1015274  
JGI12104J13512\_1015332  
JGI12104J13512\_1015338  
JGI12104J13512\_1015344  
JGI12104J13512\_1015345  
JGI12104J13512\_1015359  
JGI12104J13512\_1015360  
JGI12104J13512\_1015376  
JGI12104J13512\_1015398  
JGI12104J13512\_1015410  
JGI12104J13512\_1015483  
JGI12104J13512\_1015490  
JGI12104J13512\_1015493  
JGI12104J13512\_1015519  
JGI12104J13512\_1015534  
JGI12104J13512\_1015578  
JGI12104J13512\_1015587  
JGI12104J13512\_1015604  
JGI12104J13512\_1015628  
JGI12104J13512\_1015648  
JGI12104J13512\_1015655  
JGI12104J13512\_1015656  
JGI12104J13512\_1015670  
JGI12104J13512\_1015699  
JGI12104J13512\_1015748  
JGI12104J13512\_1015755  
JGI12104J13512\_1015759  
JGI12104J13512\_1015779  
JGI12104J13512\_1015788  
JGI12104J13512\_1015814  
JGI12104J13512\_1015828  
JGI12104J13512\_1015842

JGI12104J13512\_1015870  
JGI12104J13512\_1015894  
JGI12104J13512\_1015895  
JGI12104J13512\_1015911  
JGI12104J13512\_1015926  
JGI12104J13512\_1015958  
JGI12104J13512\_1015987  
JGI12104J13512\_1015999  
JGI12104J13512\_1016036  
JGI12104J13512\_1016038  
JGI12104J13512\_1016064  
JGI12104J13512\_1016079  
JGI12104J13512\_1016098  
JGI12104J13512\_1016099  
JGI12104J13512\_1016101  
JGI12104J13512\_1016129  
JGI12104J13512\_1016147  
JGI12104J13512\_1016221  
JGI12104J13512\_1016240  
JGI12104J13512\_1016287  
JGI12104J13512\_1016309  
JGI12104J13512\_1016318  
JGI12104J13512\_1016328  
JGI12104J13512\_1016415  
JGI12104J13512\_1016439  
JGI12104J13512\_1016447  
JGI12104J13512\_1016471  
JGI12104J13512\_1016507  
JGI12104J13512\_1016528  
JGI12104J13512\_1016530  
JGI12104J13512\_1016561  
JGI12104J13512\_1016605  
JGI12104J13512\_1016618  
JGI12104J13512\_1016637  
JGI12104J13512\_1016638  
JGI12104J13512\_1016665  
JGI12104J13512\_1016672  
JGI12104J13512\_1016695  
JGI12104J13512\_1016697  
JGI12104J13512\_1016751  
JGI12104J13512\_1016821  
JGI12104J13512\_1016835  
JGI12104J13512\_1016872

JGI12104J13512\_1017004  
JGI12104J13512\_1017039  
JGI12104J13512\_1017041  
JGI12104J13512\_1017083  
JGI12104J13512\_1017091  
JGI12104J13512\_1017103  
JGI12104J13512\_1017105  
JGI12104J13512\_1017172  
JGI12104J13512\_1017218  
JGI12104J13512\_1017257  
JGI12104J13512\_1017278  
JGI12104J13512\_1017315  
JGI12104J13512\_1017366  
JGI12104J13512\_1017386  
JGI12104J13512\_1017432  
JGI12104J13512\_1017443  
JGI12104J13512\_1017492  
JGI12104J13512\_1017511  
JGI12104J13512\_1017516  
JGI12104J13512\_1017546  
JGI12104J13512\_1017567  
JGI12104J13512\_1017576  
JGI12104J13512\_1017631  
JGI12104J13512\_1017747  
JGI12104J13512\_1017772  
JGI12104J13512\_1017780  
JGI12104J13512\_1017800  
JGI12104J13512\_1017815  
JGI12104J13512\_1017883  
JGI12104J13512\_1017906  
JGI12104J13512\_1017952  
JGI12104J13512\_1017976  
JGI12104J13512\_1018043  
JGI12104J13512\_1018048  
JGI12104J13512\_1018051  
JGI12104J13512\_1018067  
JGI12104J13512\_1018179  
JGI12104J13512\_1018232  
JGI12104J13512\_1018235  
JGI12104J13512\_1018289  
JGI12104J13512\_1018340  
JGI12104J13512\_1018360  
JGI12104J13512\_1018475

JGI12104J13512\_1018487  
JGI12104J13512\_1018509  
JGI12104J13512\_1018522  
JGI12104J13512\_1018549  
JGI12104J13512\_1018559  
JGI12104J13512\_1018585  
JGI12104J13512\_1018607  
JGI12104J13512\_1018639  
JGI12104J13512\_1018644  
JGI12104J13512\_1018649  
JGI12104J13512\_1018741  
JGI12104J13512\_1018816  
JGI12104J13512\_1018826  
JGI12104J13512\_1018865  
JGI12104J13512\_1018989  
JGI12104J13512\_1018995  
JGI12104J13512\_1018998  
JGI12104J13512\_1019033  
JGI12104J13512\_1019064  
JGI12104J13512\_1019140  
JGI12104J13512\_1019224  
JGI12104J13512\_1019243  
JGI12104J13512\_1019269  
JGI12104J13512\_1019296  
JGI12104J13512\_1019300  
JGI12104J13512\_1019306  
JGI12104J13512\_1019391  
JGI12104J13512\_1019394  
JGI12104J13512\_1019419  
JGI12104J13512\_1019468  
JGI12104J13512\_1019532  
JGI12104J13512\_1019543  
JGI12104J13512\_1019561  
JGI12104J13512\_1019569  
JGI12104J13512\_1019597  
JGI12104J13512\_1019686  
JGI12104J13512\_1019706  
JGI12104J13512\_1019787  
JGI12104J13512\_1019809  
JGI12104J13512\_1019842  
JGI12104J13512\_1019879  
JGI12104J13512\_1019935  
JGI12104J13512\_1020105

JGI12104J13512\_1020175  
JGI12104J13512\_1020226  
JGI12104J13512\_1020275  
JGI12104J13512\_1020313  
JGI12104J13512\_1020330  
JGI12104J13512\_1020332  
JGI12104J13512\_1020339  
JGI12104J13512\_1020473  
JGI12104J13512\_1020524  
JGI12104J13512\_1020526  
JGI12104J13512\_1020544  
JGI12104J13512\_1020582  
JGI12104J13512\_1020584  
JGI12104J13512\_1020655  
JGI12104J13512\_1020668  
JGI12104J13512\_1020713  
JGI12104J13512\_1020718  
JGI12104J13512\_1020802  
JGI12104J13512\_1020829  
JGI12104J13512\_1020846  
JGI12104J13512\_1020863  
JGI12104J13512\_1020878  
JGI12104J13512\_1020895  
JGI12104J13512\_1020935  
JGI12104J13512\_1020955  
JGI12104J13512\_1021056  
JGI12104J13512\_1021084  
JGI12104J13512\_1021085  
JGI12104J13512\_1021154  
JGI12104J13512\_1021191  
JGI12104J13512\_1021243  
JGI12104J13512\_1021250  
JGI12104J13512\_1021264  
JGI12104J13512\_1021356  
JGI12104J13512\_1021402  
JGI12104J13512\_1021428  
JGI12104J13512\_1021467  
JGI12104J13512\_1021544  
JGI12104J13512\_1021552  
JGI12104J13512\_1021643  
JGI12104J13512\_1021653  
JGI12104J13512\_1021697  
JGI12104J13512\_1021698

JGI12104J13512\_1021730  
JGI12104J13512\_1021814  
JGI12104J13512\_1021823  
JGI12104J13512\_1021841  
JGI12104J13512\_1021898  
JGI12104J13512\_1021921  
JGI12104J13512\_1021957  
JGI12104J13512\_1022015  
JGI12104J13512\_1022059  
JGI12104J13512\_1022074  
JGI12104J13512\_1022075  
JGI12104J13512\_1022085  
JGI12104J13512\_1022111  
JGI12104J13512\_1022114  
JGI12104J13512\_1022156  
JGI12104J13512\_1022168  
JGI12104J13512\_1022170  
JGI12104J13512\_1022224  
JGI12104J13512\_1022275  
JGI12104J13512\_1022283  
JGI12104J13512\_1022349  
JGI12104J13512\_1022354  
JGI12104J13512\_1022441  
JGI12104J13512\_1022523  
JGI12104J13512\_1022544  
JGI12104J13512\_1022613  
JGI12104J13512\_1022624  
JGI12104J13512\_1022651  
JGI12104J13512\_1022661  
JGI12104J13512\_1022673  
JGI12104J13512\_1022689  
JGI12104J13512\_1022776  
JGI12104J13512\_1022902  
JGI12104J13512\_1022919  
JGI12104J13512\_1022963  
JGI12104J13512\_1022990  
JGI12104J13512\_1023062  
JGI12104J13512\_1023130  
JGI12104J13512\_1023161  
JGI12104J13512\_1023208  
JGI12104J13512\_1023298  
JGI12104J13512\_1023412  
JGI12104J13512\_1023540

JGI12104J13512\_1023721  
JGI12104J13512\_1023734  
JGI12104J13512\_1023768  
JGI12104J13512\_1023791  
JGI12104J13512\_1024031  
JGI12104J13512\_1024129  
JGI12104J13512\_1024174  
JGI12104J13512\_1024274  
JGI12104J13512\_1024310  
JGI12104J13512\_1024364  
JGI12104J13512\_1024402  
JGI12104J13512\_1024546  
JGI12104J13512\_1024574  
JGI12104J13512\_1024586  
JGI12104J13512\_1024668  
JGI12104J13512\_1024730  
JGI12104J13512\_1024740  
JGI12104J13512\_1024742  
JGI12104J13512\_1024830  
JGI12104J13512\_1024868  
JGI12104J13512\_1024874  
JGI12104J13512\_1024929  
JGI12104J13512\_1024959  
JGI12104J13512\_1025000  
JGI12104J13512\_1025008  
JGI12104J13512\_1025092  
JGI12104J13512\_1025227  
JGI12104J13512\_1025242  
JGI12104J13512\_1025318  
JGI12104J13512\_1025324  
JGI12104J13512\_1025371  
JGI12104J13512\_1025412  
JGI12104J13512\_1025425  
JGI12104J13512\_1025646  
JGI12104J13512\_1025649  
JGI12104J13512\_1025701  
JGI12104J13512\_1025731  
JGI12104J13512\_1025837  
JGI12104J13512\_1025852  
JGI12104J13512\_1025875  
JGI12104J13512\_1025936  
JGI12104J13512\_1025941  
JGI12104J13512\_1026079



JGI12104J13512\_1026097  
JGI12104J13512\_1026100  
JGI12104J13512\_1026149  
JGI12104J13512\_1026194  
JGI12104J13512\_1026210  
JGI12104J13512\_1026372  
JGI12104J13512\_1026460  
JGI12104J13512\_1026486  
JGI12104J13512\_1026677  
JGI12104J13512\_1026821  
JGI12104J13512\_1027002  
JGI12104J13512\_1027012  
JGI12104J13512\_1027065  
JGI12104J13512\_1027151  
JGI12104J13512\_1027195  
JGI12104J13512\_1027218  
JGI12104J13512\_1027232  
JGI12104J13512\_1027271  
JGI12104J13512\_1027314  
JGI12104J13512\_1027421  
JGI12104J13512\_1027423  
JGI12104J13512\_1027435  
JGI12104J13512\_1027439  
JGI12104J13512\_1027456  
JGI12104J13512\_1027501  
JGI12104J13512\_1027533  
JGI12104J13512\_1027610  
JGI12104J13512\_1027630  
JGI12104J13512\_1027710  
JGI12104J13512\_1027922  
JGI12104J13512\_1027934  
JGI12104J13512\_1027936  
JGI12104J13512\_1028019  
JGI12104J13512\_1028020  
JGI12104J13512\_1028280  
JGI12104J13512\_1028322  
JGI12104J13512\_1028381  
JGI12104J13512\_1028585  
JGI12104J13512\_1028721  
JGI12104J13512\_1028820  
JGI12104J13512\_1028838  
JGI12104J13512\_1028867  
JGI12104J13512\_1028913

JGI12104J13512\_1028953  
JGI12104J13512\_1029191  
JGI12104J13512\_1029423  
JGI12104J13512\_1029441  
JGI12104J13512\_1029494  
JGI12104J13512\_1029565  
JGI12104J13512\_1029634  
JGI12104J13512\_1029638  
JGI12104J13512\_1029647  
JGI12104J13512\_1029712  
JGI12104J13512\_1029726  
JGI12104J13512\_1029753  
JGI12104J13512\_1029844  
JGI12104J13512\_1029849  
JGI12104J13512\_1029906  
JGI12104J13512\_1029914  
JGI12104J13512\_1030040  
JGI12104J13512\_1044467  
JGI12104J13512\_1044481  
JGI12104J13512\_1044578  
JGI12104J13512\_1045026  
JGI12104J13512\_1046246  
JGI12104J13512\_1046731  
JGI12104J13512\_1046838  
JGI12104J13512\_1047471  
JGI12104J13512\_1048575  
JGI12104J13512\_1049055  
JGI12104J13512\_1049146  
JGI12104J13512\_1049649  
JGI12104J13512\_1050041  
JGI12104J13512\_1050055  
JGI12104J13512\_1050091  
JGI12104J13512\_1050515  
JGI12104J13512\_1050540  
JGI12104J13512\_1050720  
JGI12104J13512\_1050867  
JGI12104J13512\_1051150  
JGI12104J13512\_1051666  
JGI12104J13512\_1051790  
JGI12104J13512\_1051913  
JGI12104J13512\_1052019  
JGI12104J13512\_1052041  
JGI12104J13512\_1053855

JGI12104J13512\_1053985  
JGI12104J13512\_1056477  
JGI12104J13512\_1057454  
JGI12104J13512\_1057620  
JGI12104J13512\_1058050  
JGI12104J13512\_1058781  
JGI12104J13512\_1059339  
JGI12104J13512\_1059710  
JGI12104J13512\_1059785  
JGI12104J13512\_1060719  
JGI12104J13512\_1060777  
JGI12104J13512\_1061581  
JGI12104J13512\_1062238  
JGI12104J13512\_1063346  
JGI12104J13512\_1063590  
JGI12104J13512\_1064024  
JGI12104J13512\_1064087  
JGI12104J13512\_1064652  
JGI12104J13512\_1065601
